# Supplementary material
Source: publisher figshare collection journal article supplement (https://springernature.figshare.com/ndownloader/files/12941978)

Marks

H3K27me3

H3K36me3

H3K9me3

H3K4me1

H3K27ac

H3K4me3

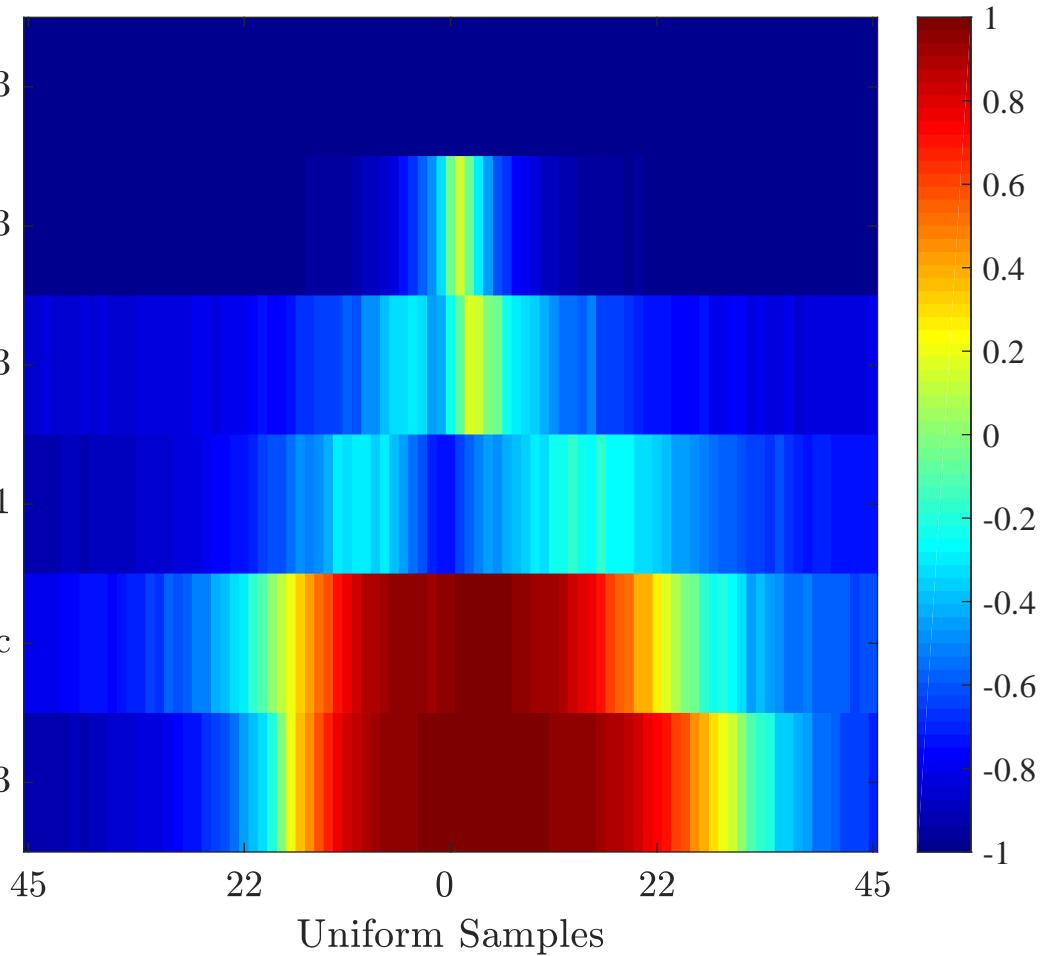

Supplement: Supplementary file 1 [file 12941978]

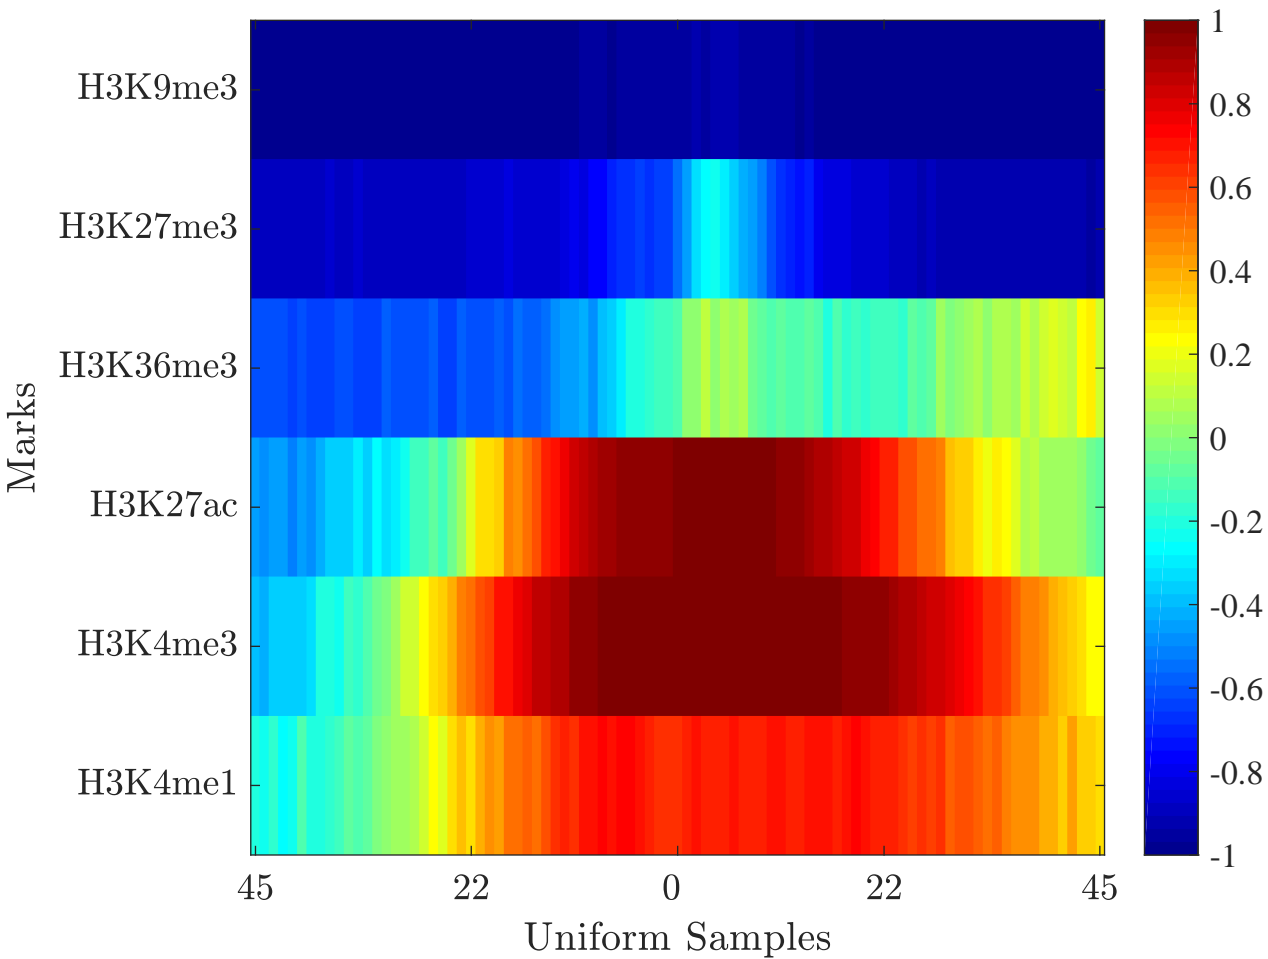

Supplement: Supplementary file 2 [file 12941978]

Marks

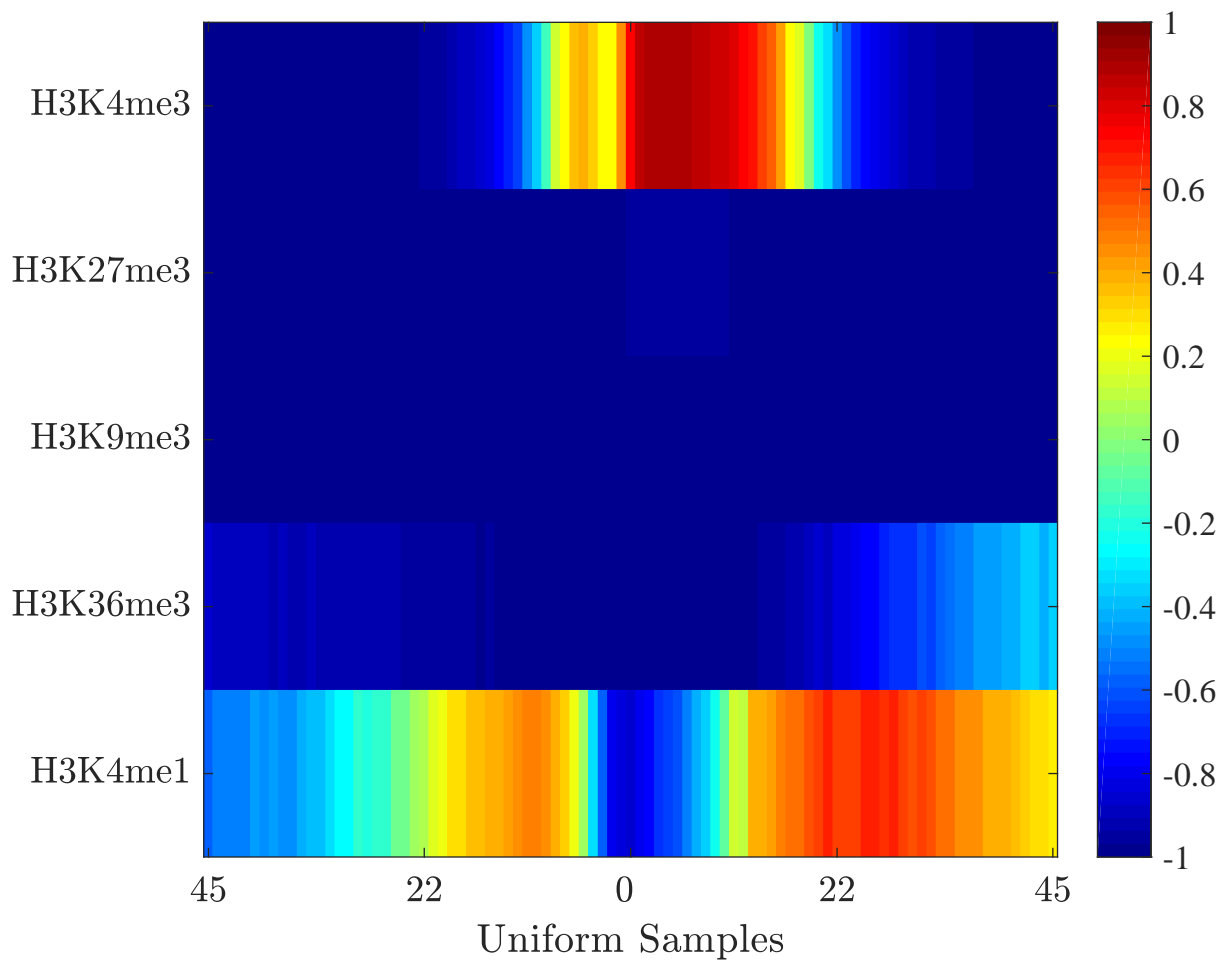

Supplement: Supplementary file 3 [file 12941978]

Marks

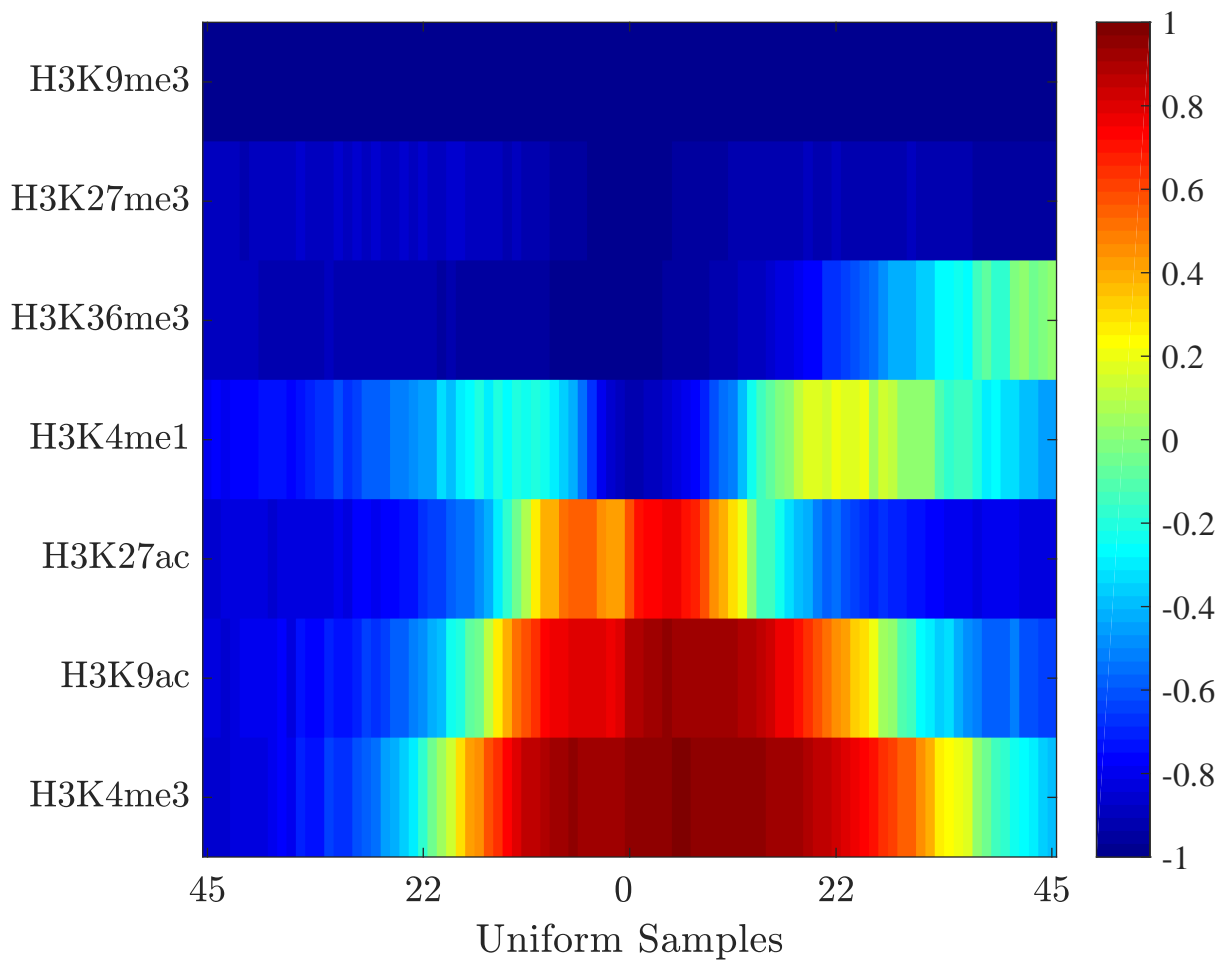

Supplement: Supplementary file 4 [file 12941978]

Marks

H3K27me3

H3K36me3

H3K9me3

H3K27ac

H3K4me3

H3K4me1

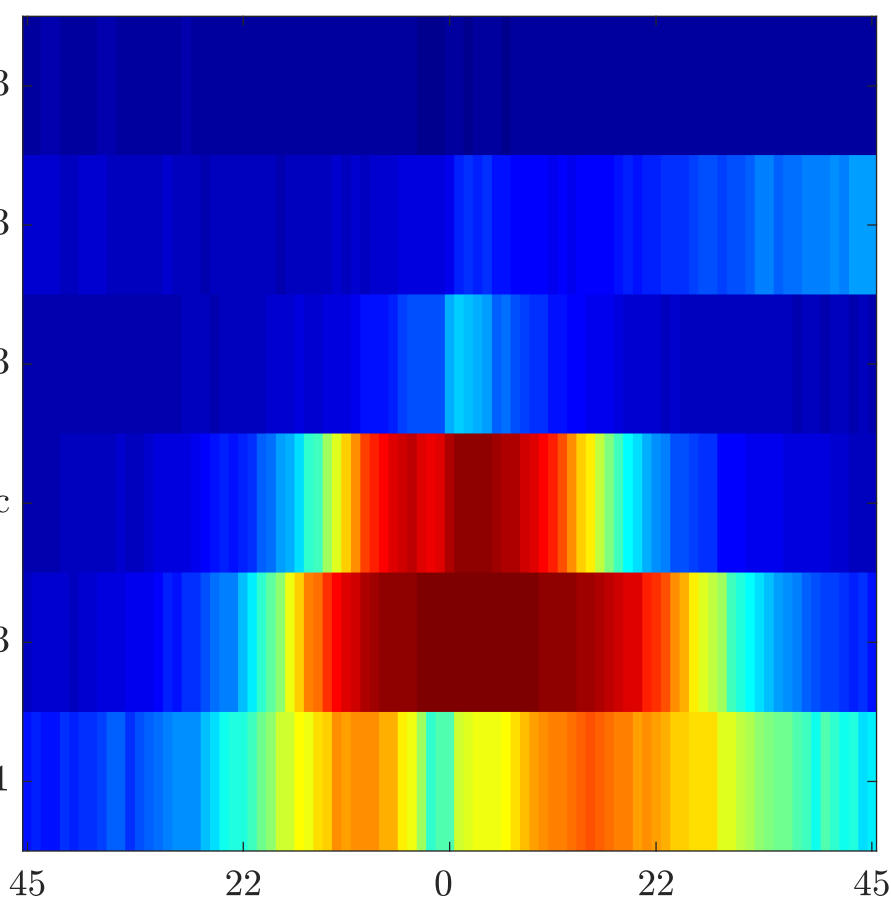

Uniform Samples

Supplement: Supplementary file 5 [file 12941978]

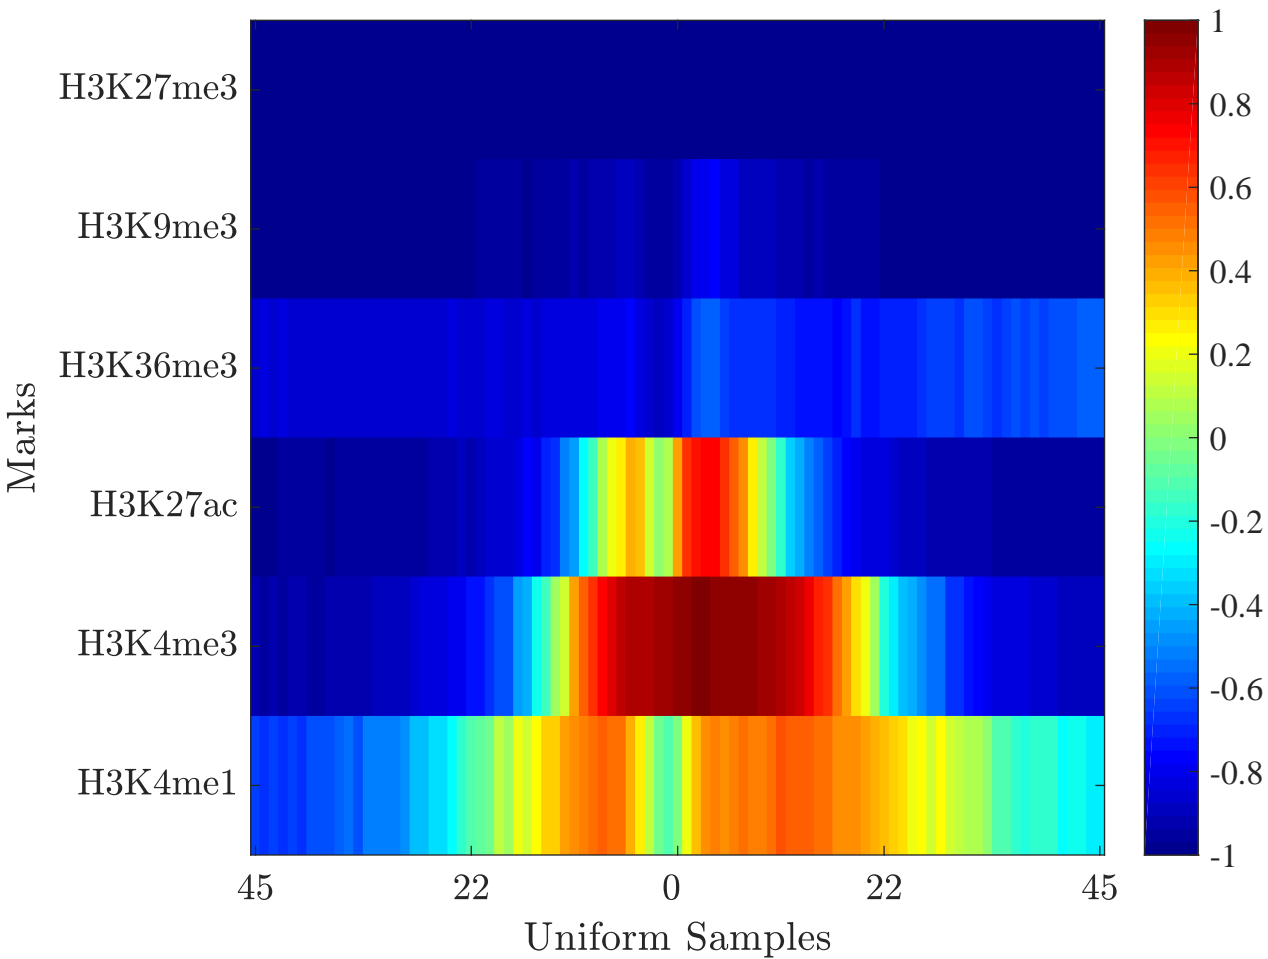

Supplement: Supplementary file 6 [file 12941978]

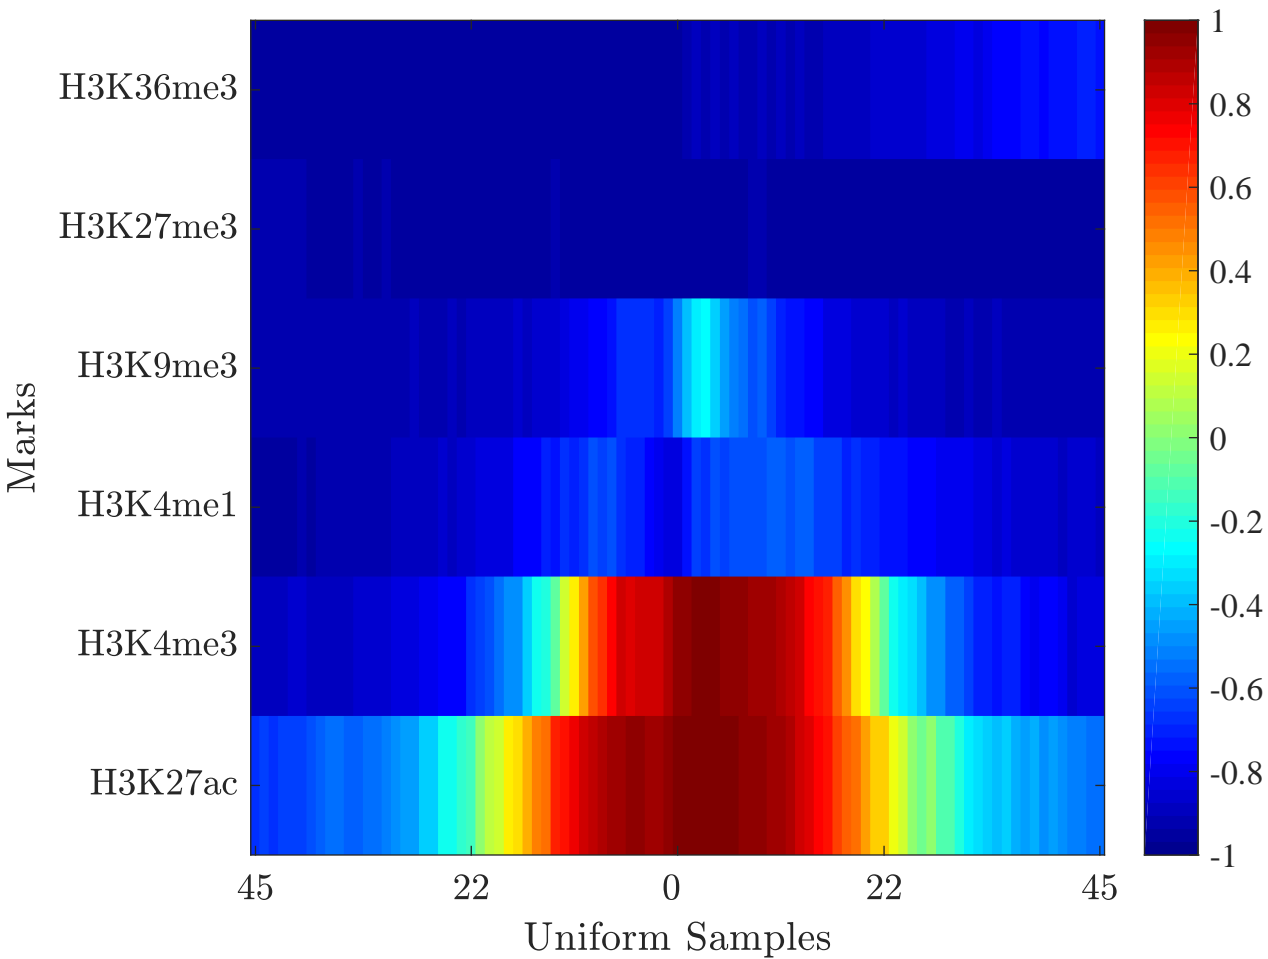

Supplement: Supplementary file 7 [file 12941978]

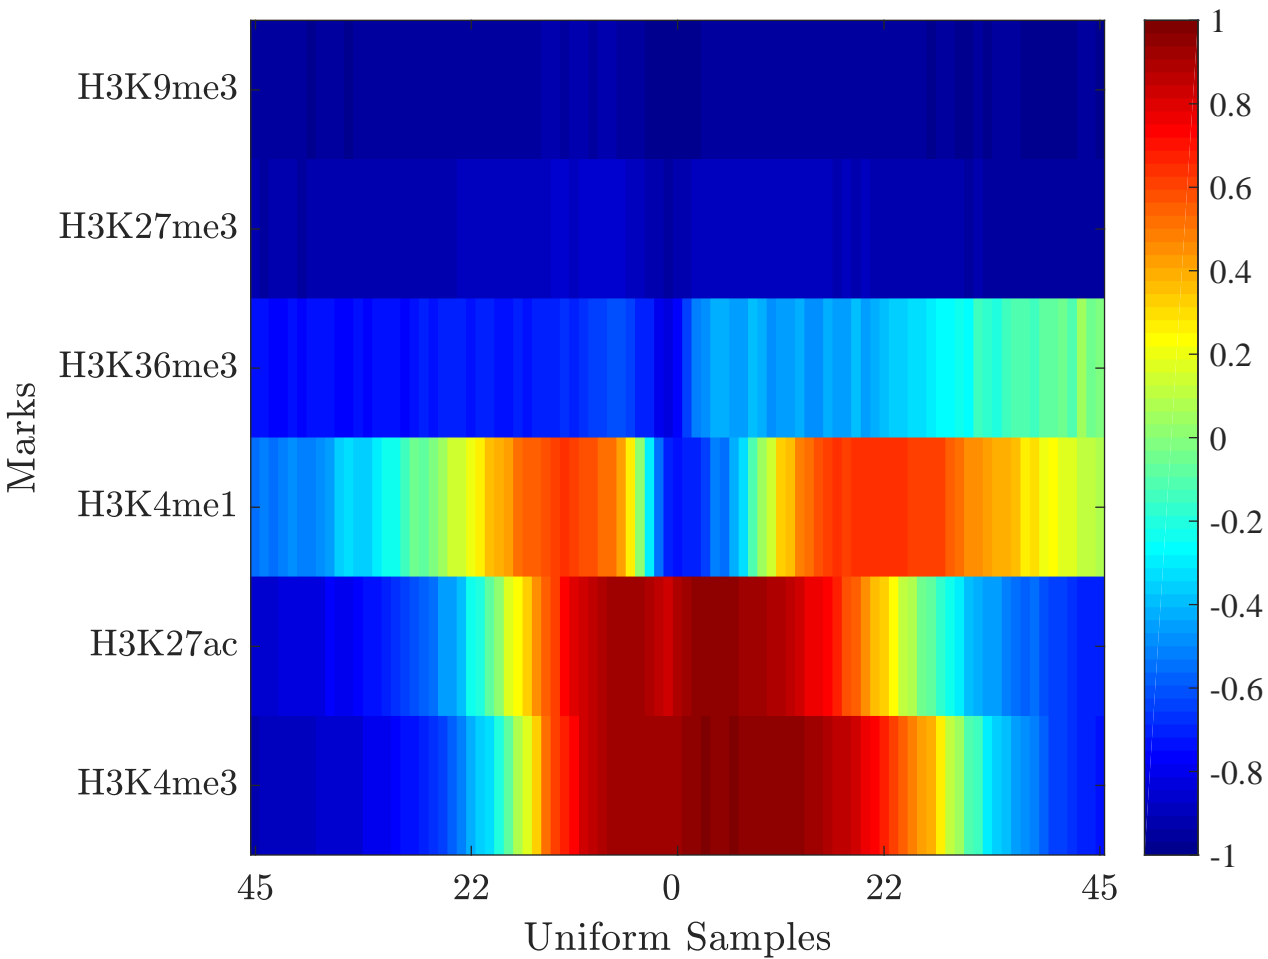

Supplement: Supplementary file 8 [file 12941978]

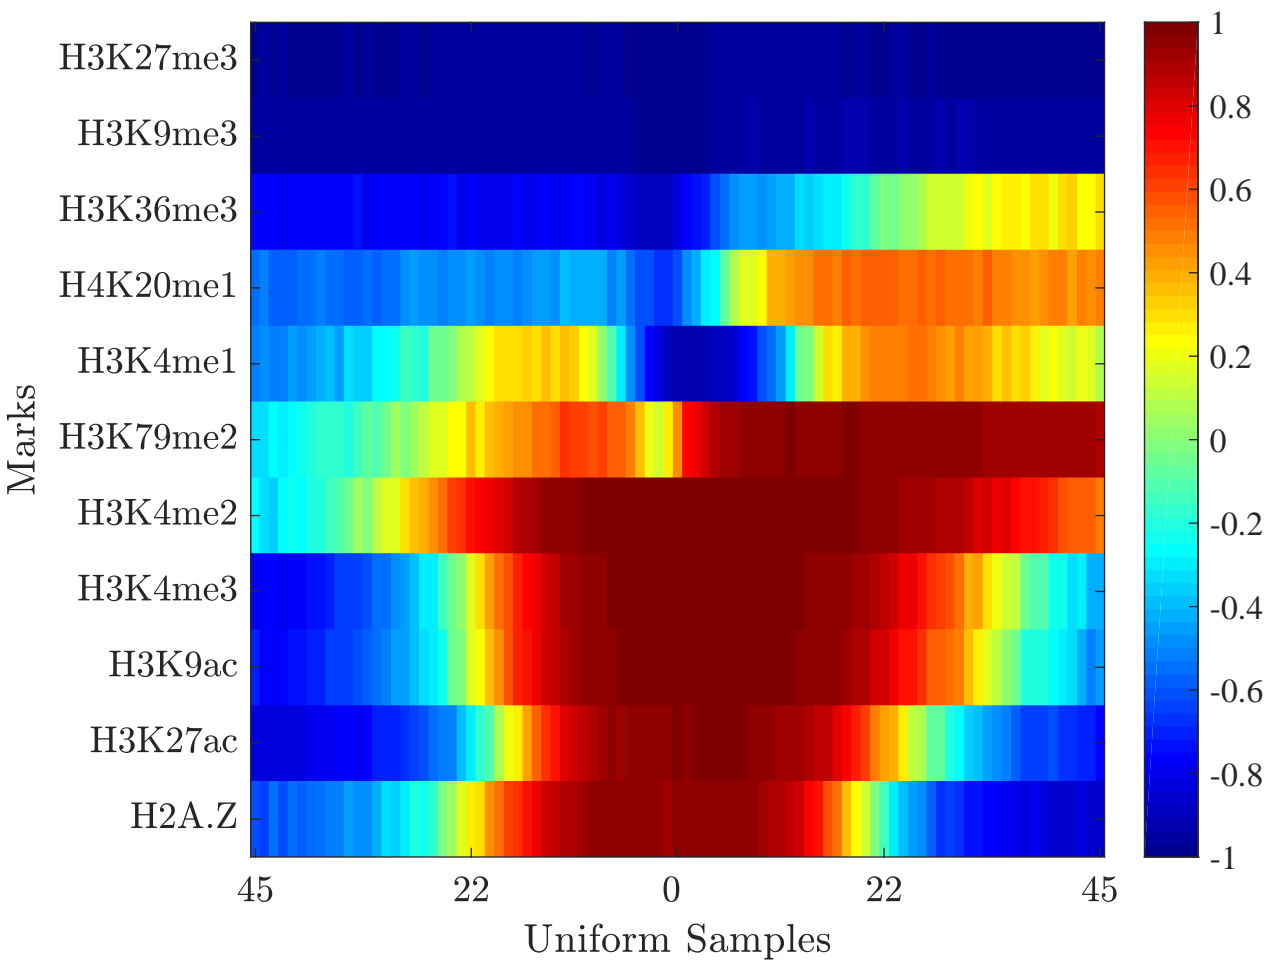

Supplement: Supplementary file 9 [file 12941978]

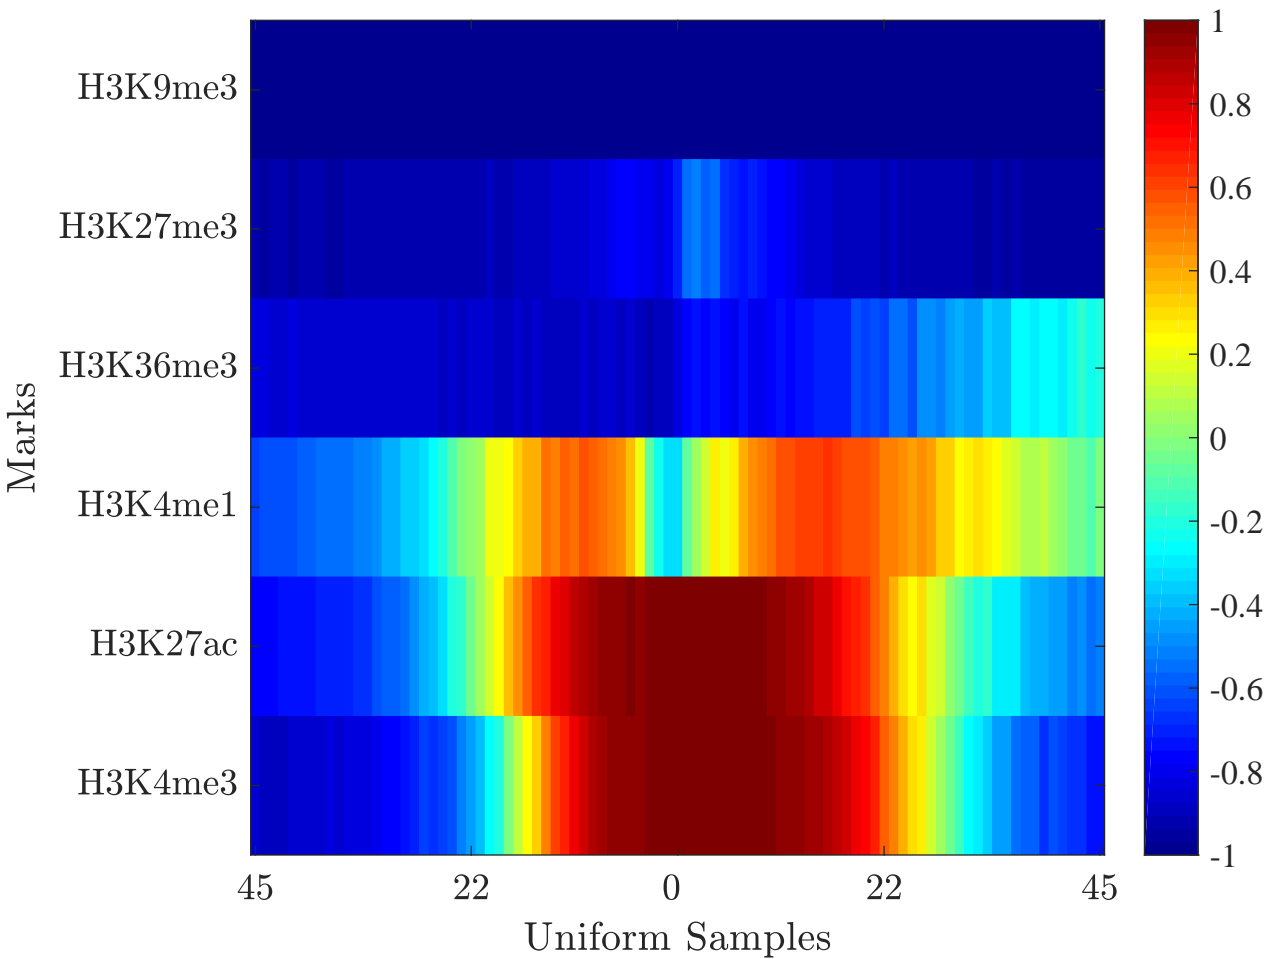

Supplement: Supplementary file 10 [file 12941978]

Marks

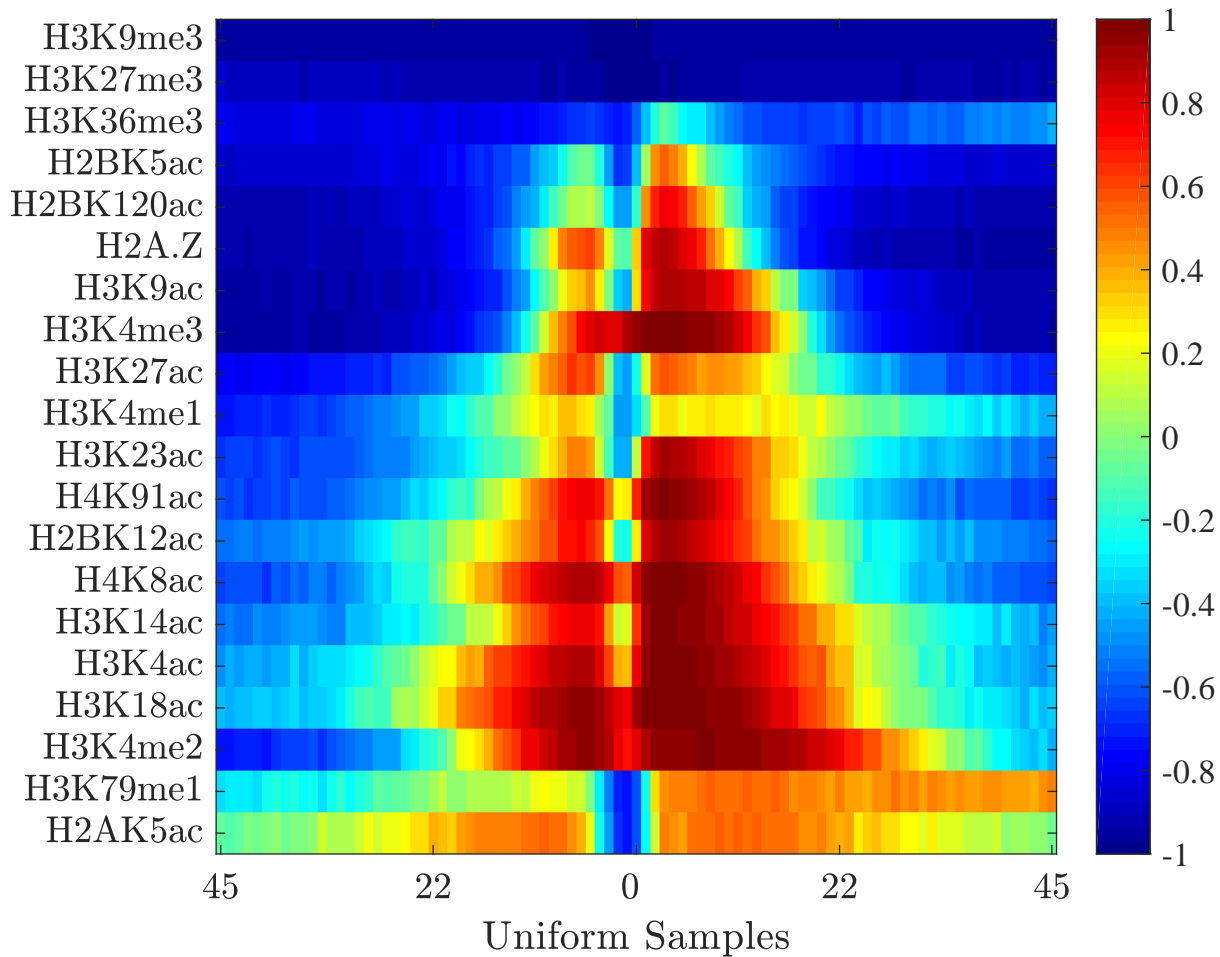

Supplement: Supplementary file 11 [file 12941978]

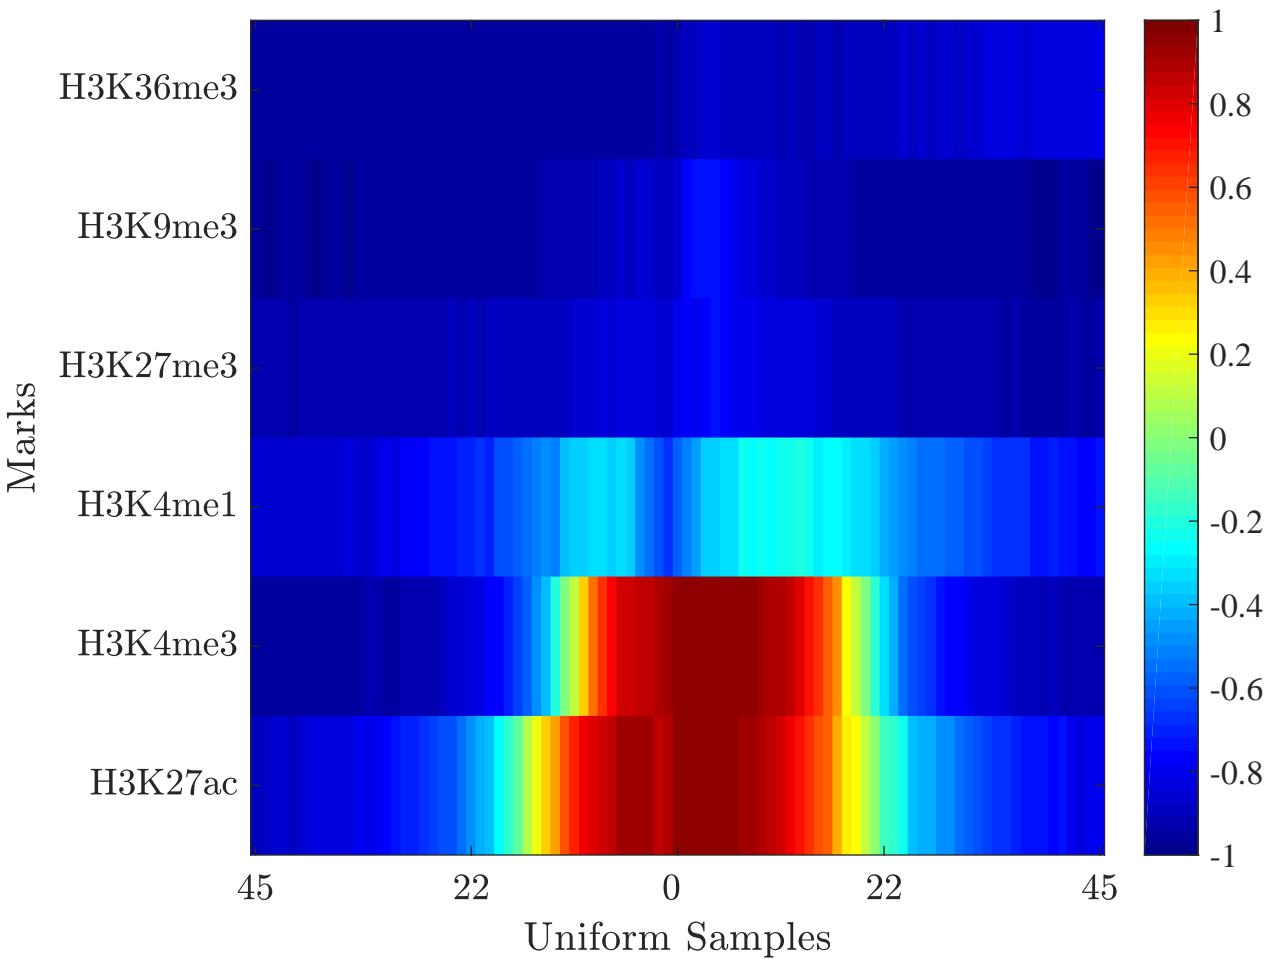

Supplement: Supplementary file 12 [file 12941978]

Marks

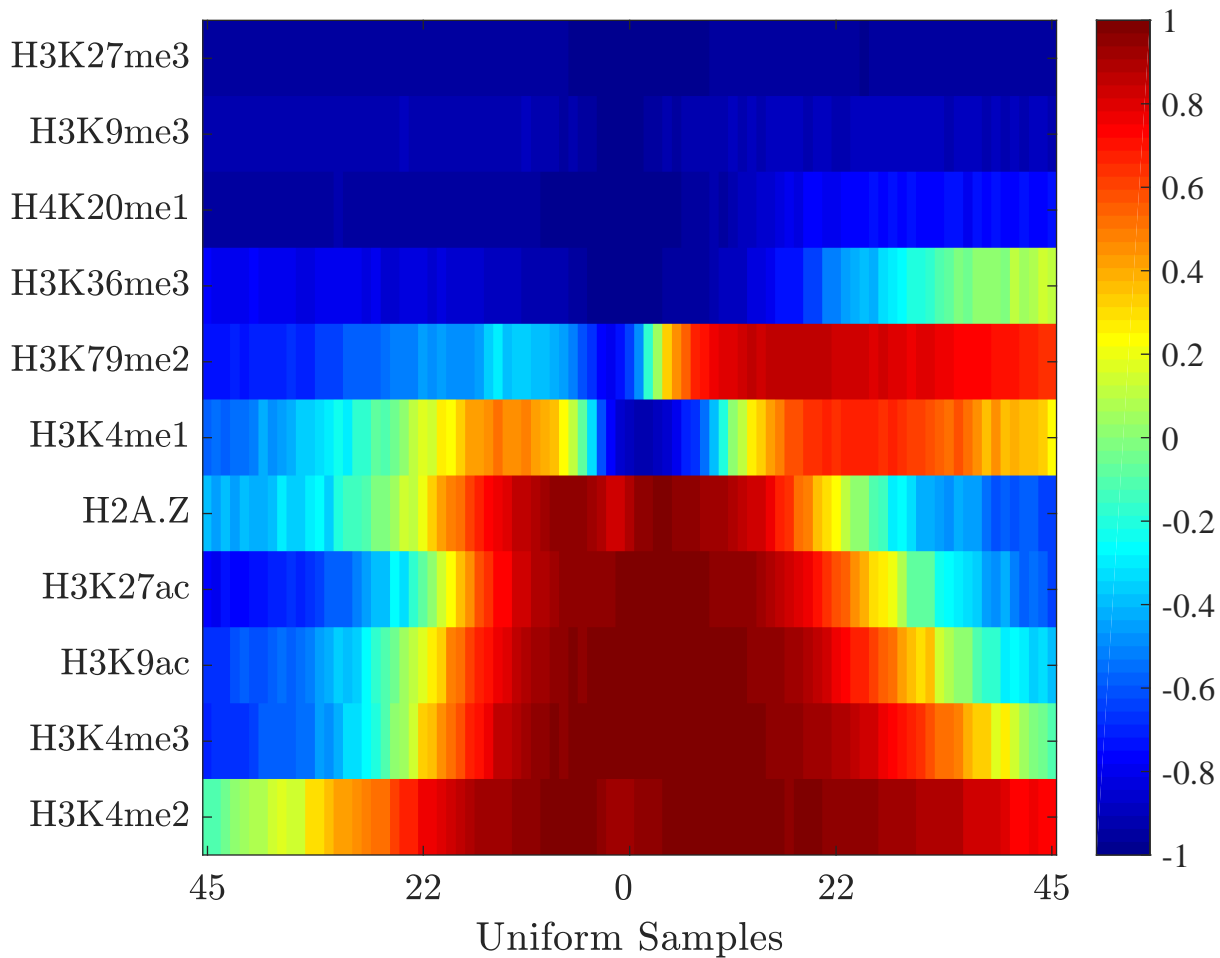

Supplement: Supplementary file 14 [file 12941978]

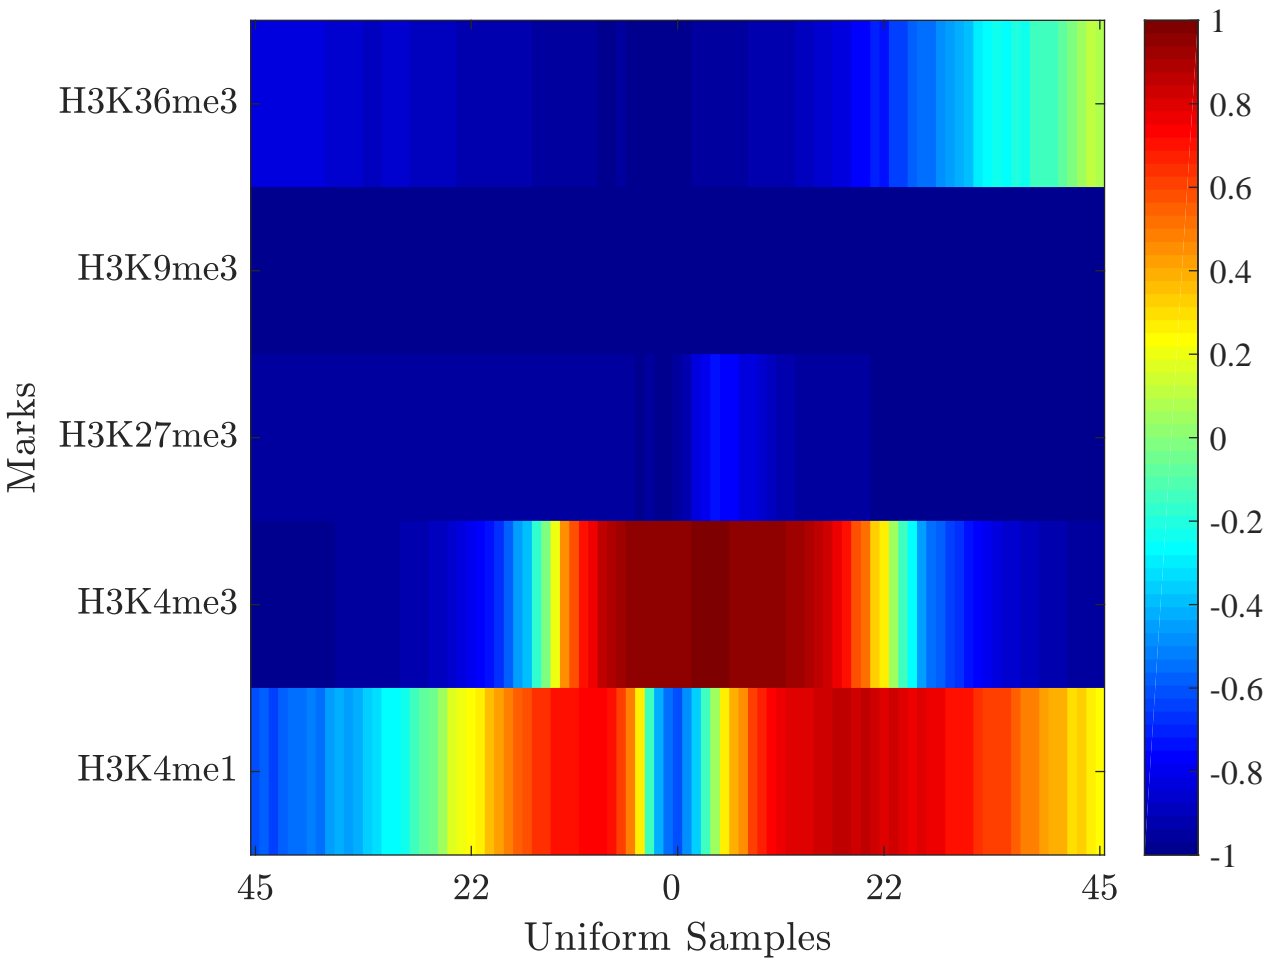

Supplement: Supplementary file 15 [file 12941978]

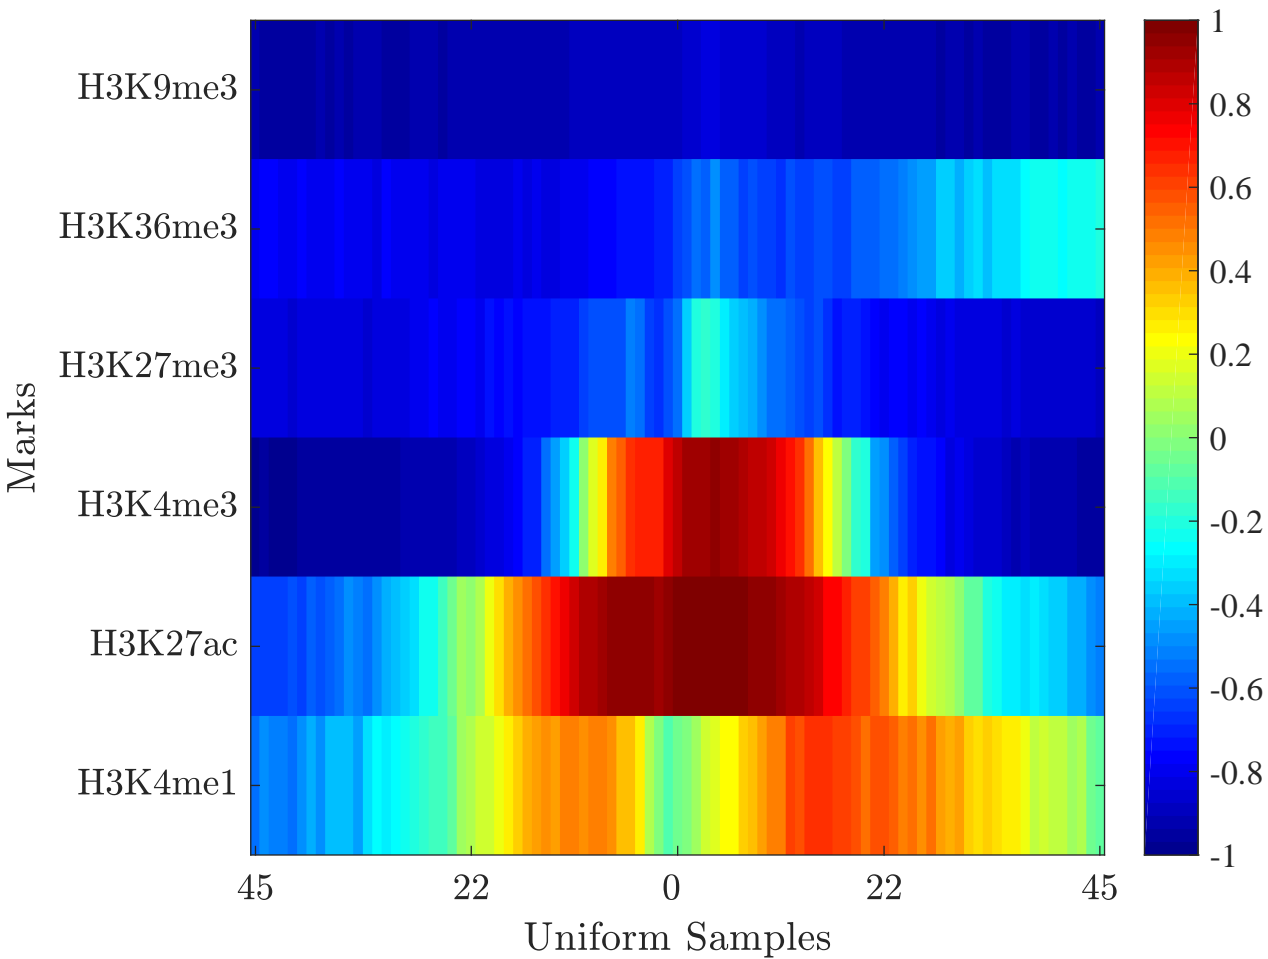

Supplement: Supplementary file 16 [file 12941978]

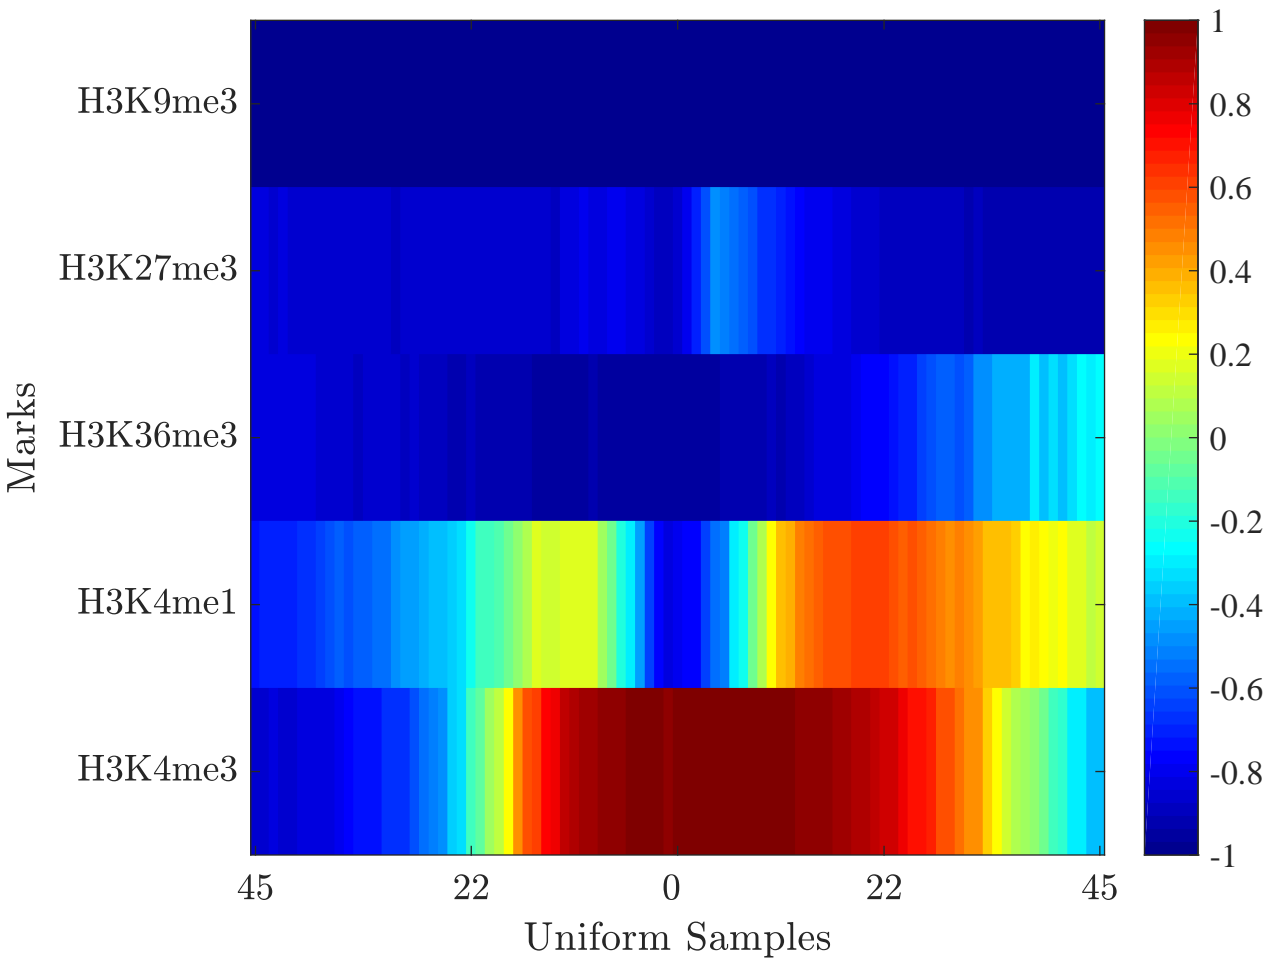

Supplement: Supplementary file 17 [file 12941978]

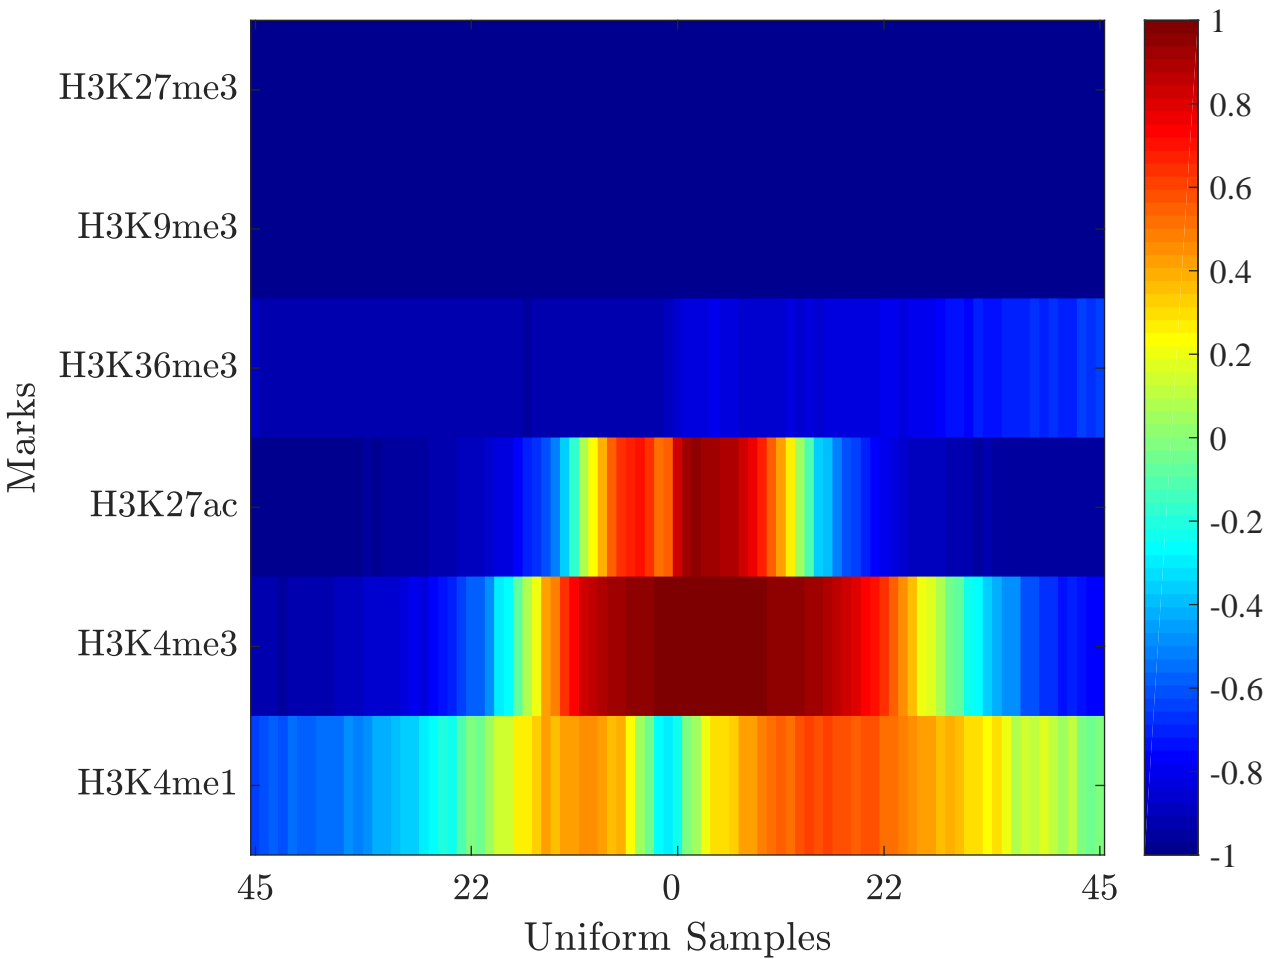

Supplement: Supplementary file 18 [file 12941978]

Marks

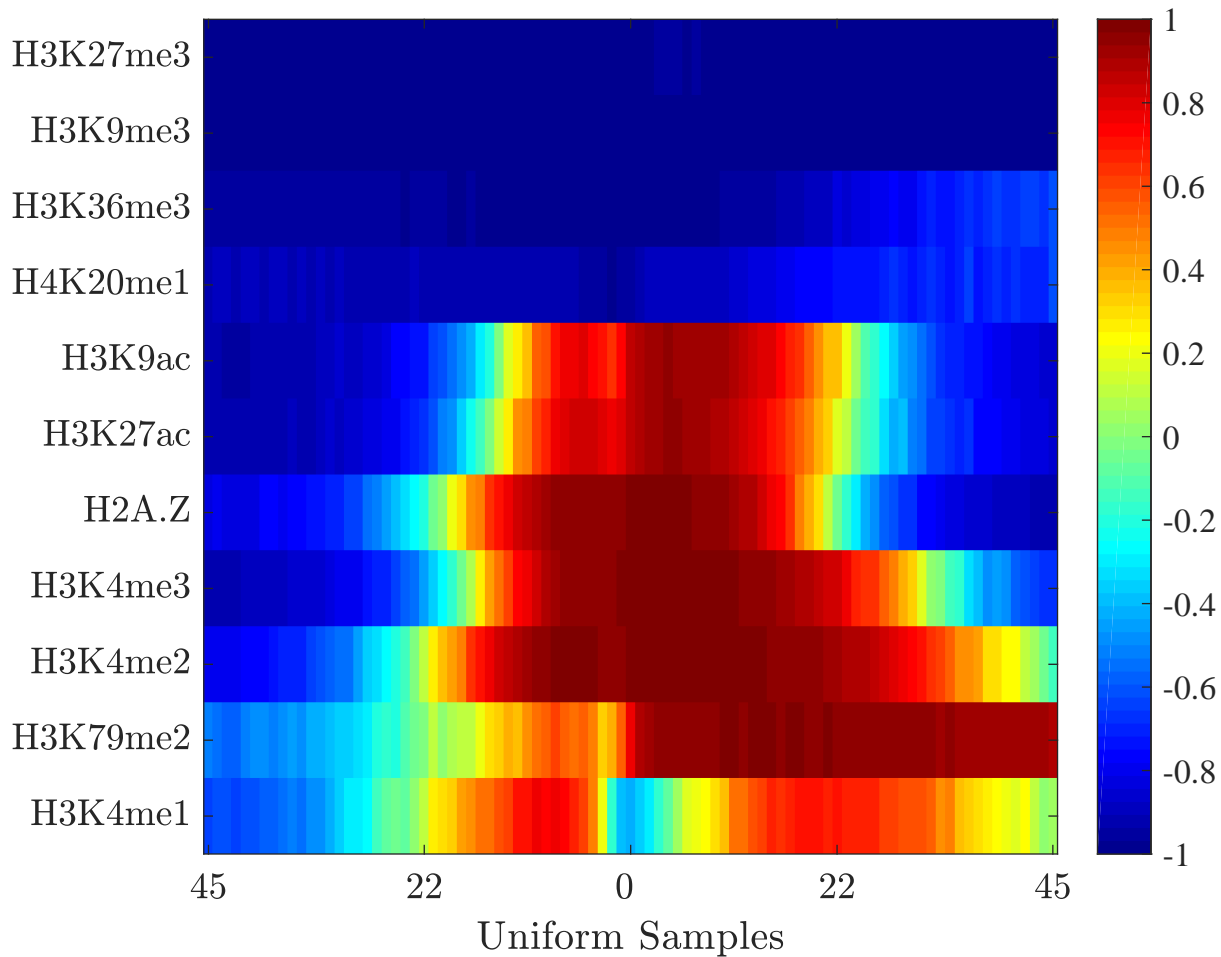

Supplement: Supplementary file 19 [file 12941978]

Marks

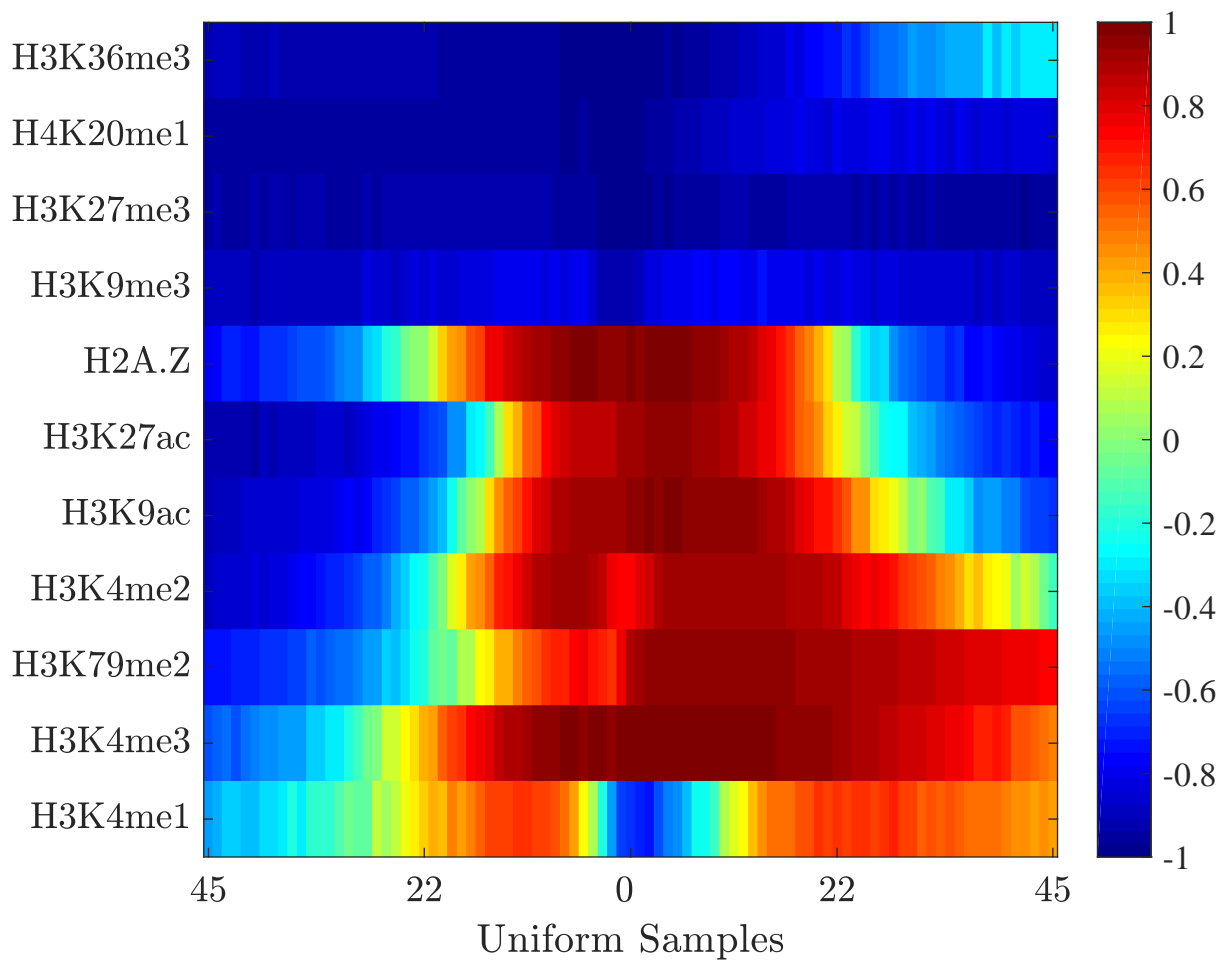

Supplement: Supplementary file 20 [file 12941978]

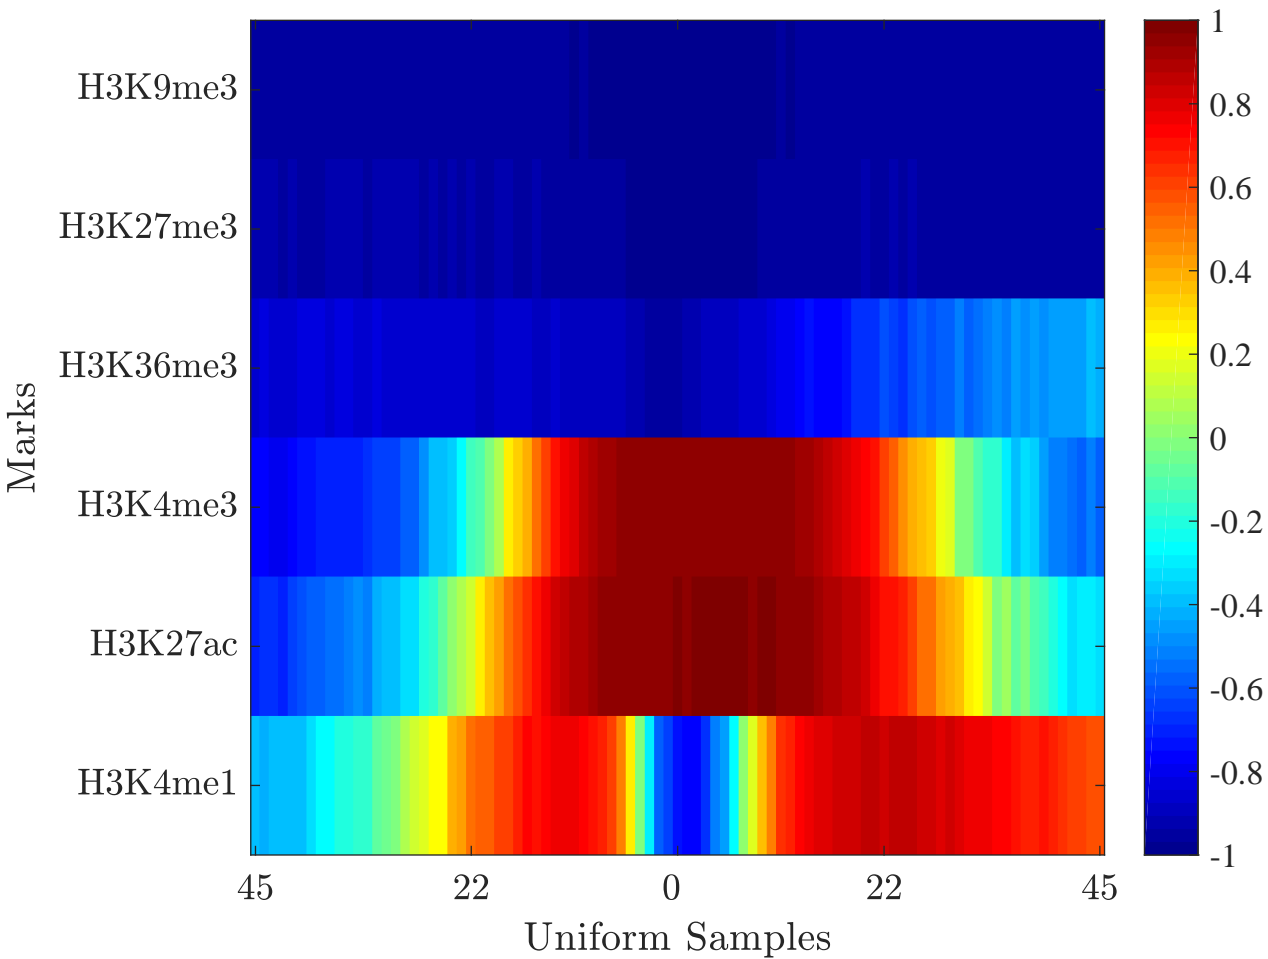

Supplement: Supplementary file 21 [file 12941978]

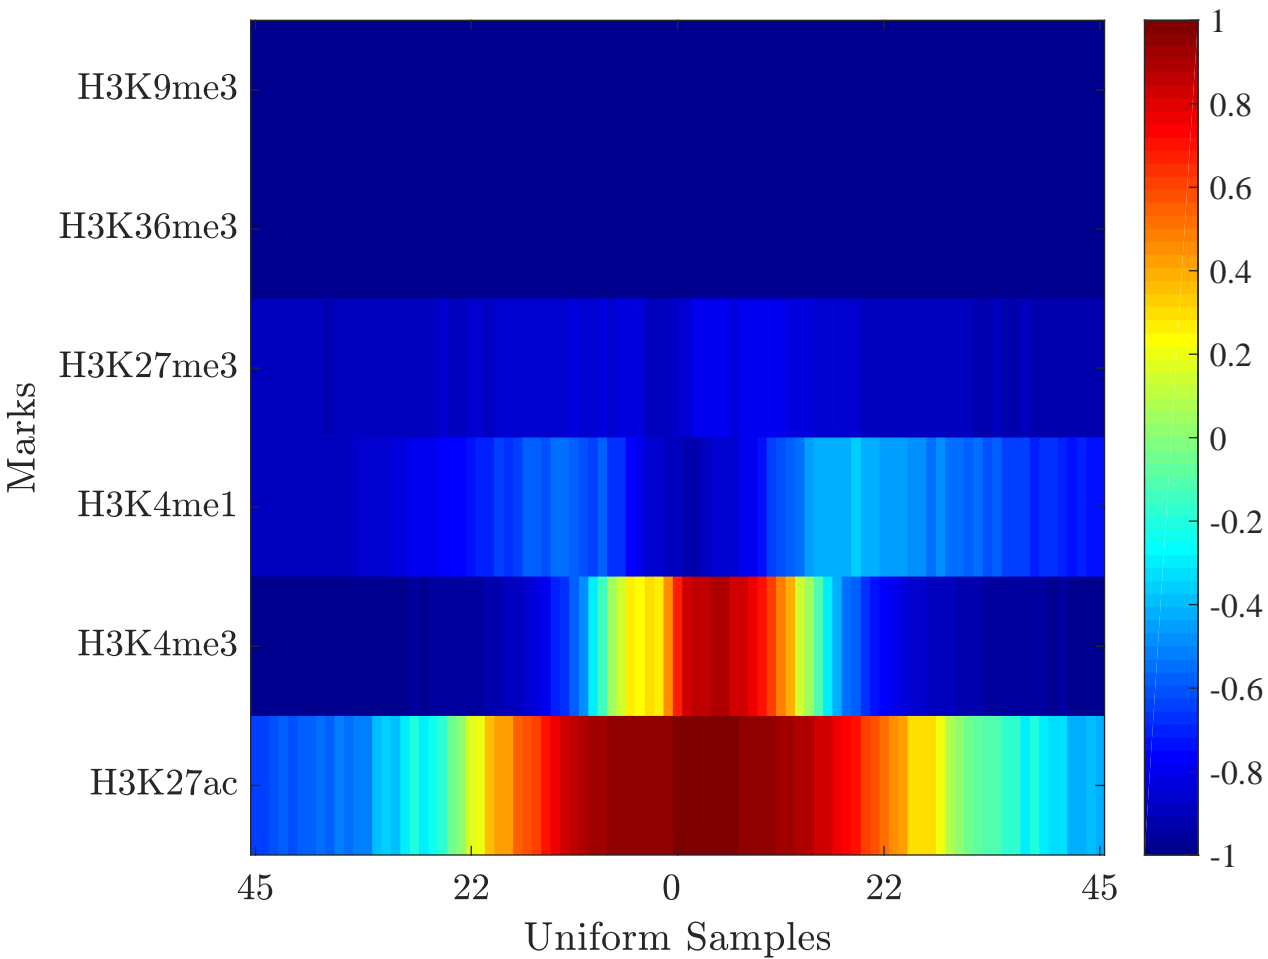

Supplement: Supplementary file 22 [file 12941978]

Marks

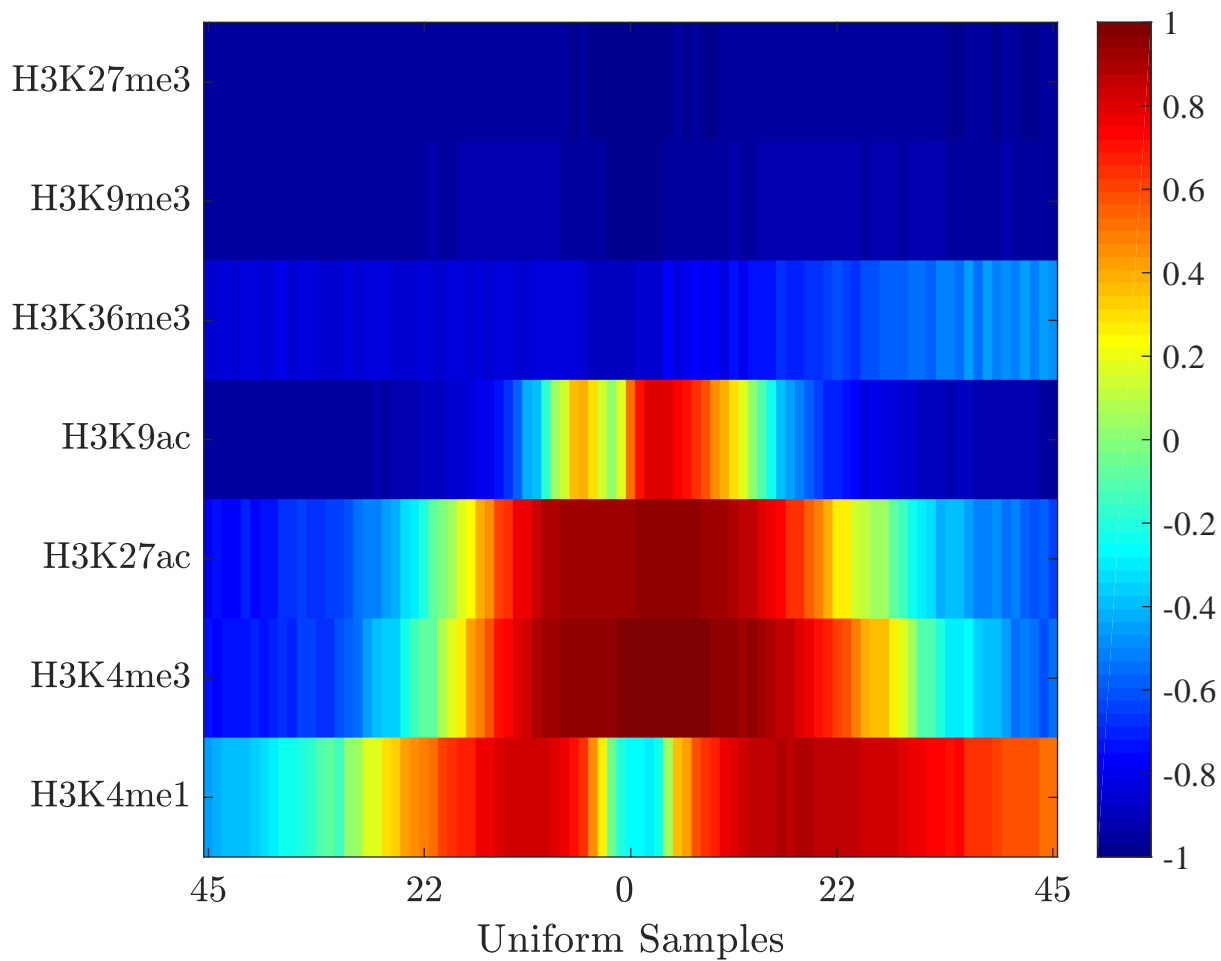

Supplement: Supplementary file 23 [file 12941978]

Marks

H3K36me3

H3K9me3

H3K27me3

H3K4me1

H3K27ac

H3K9ac

H3K4me3

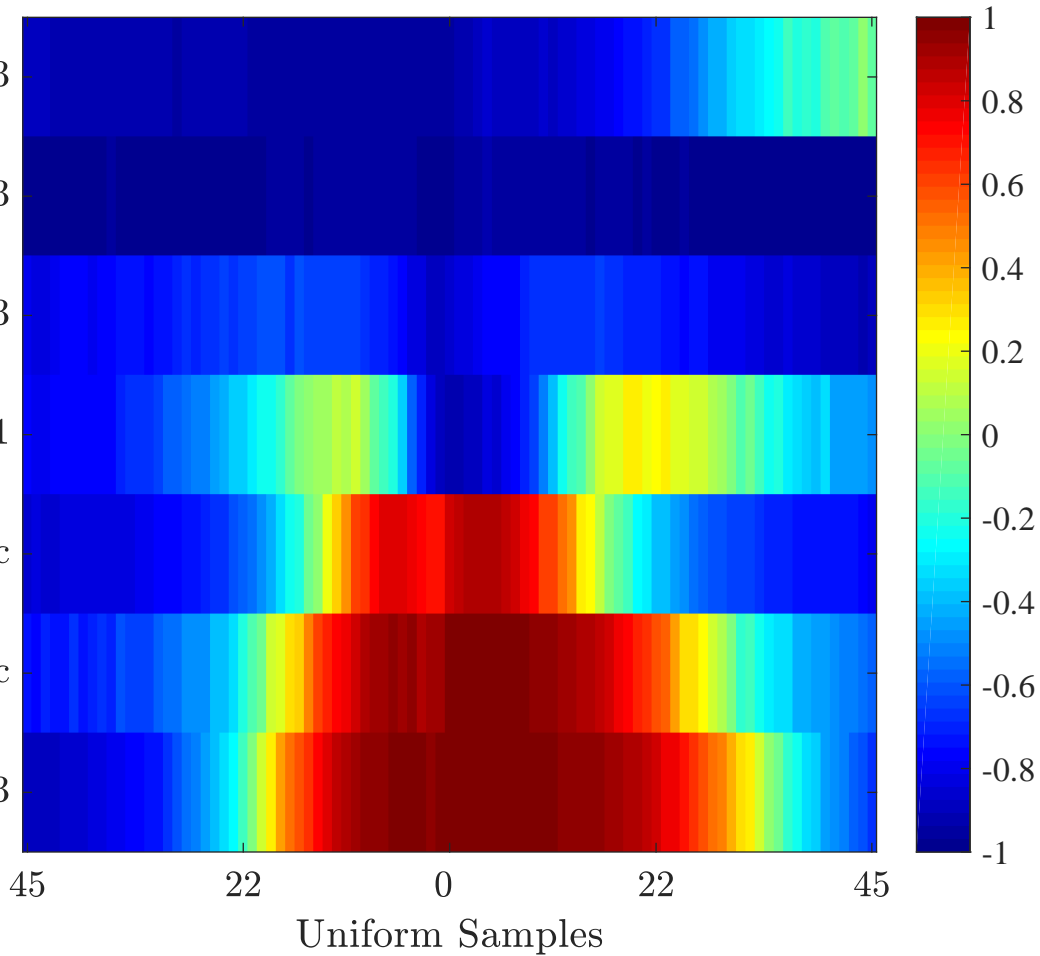

Supplement: Supplementary file 24 [file 12941978]

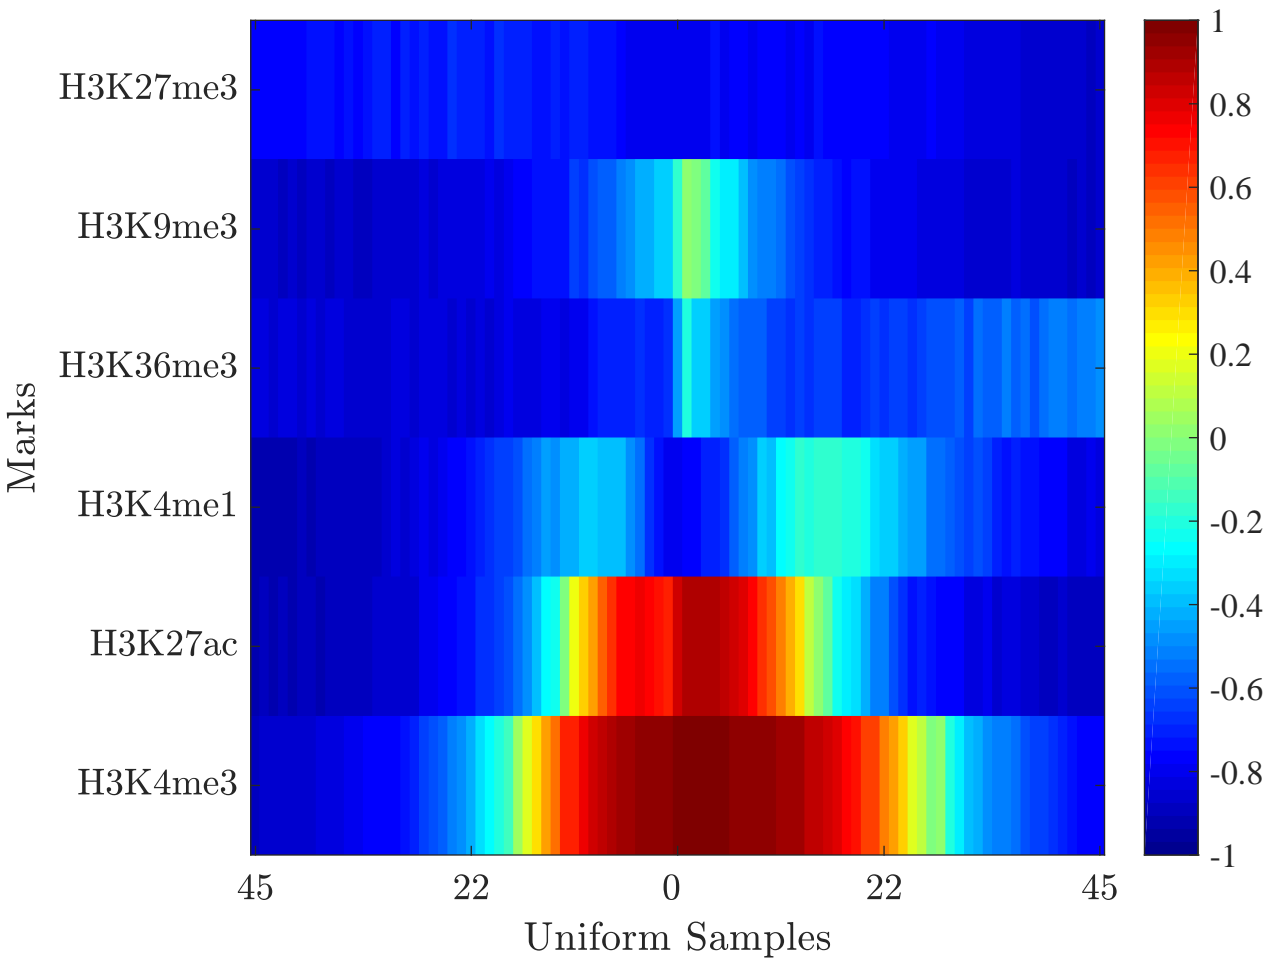

Supplement: Supplementary file 25 [file 12941978]

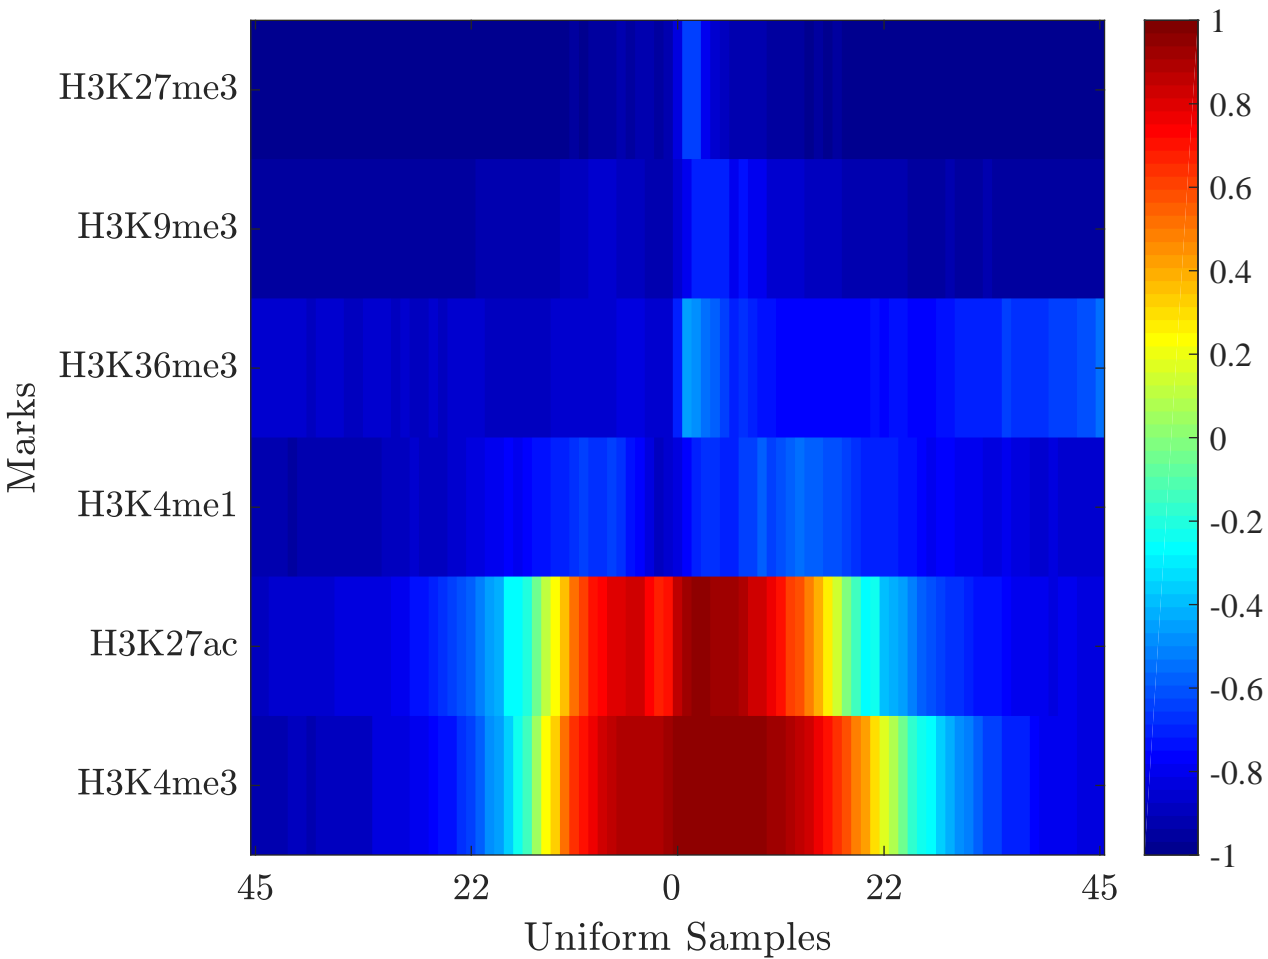

Supplement: Supplementary file 26 [file 12941978]

Marks

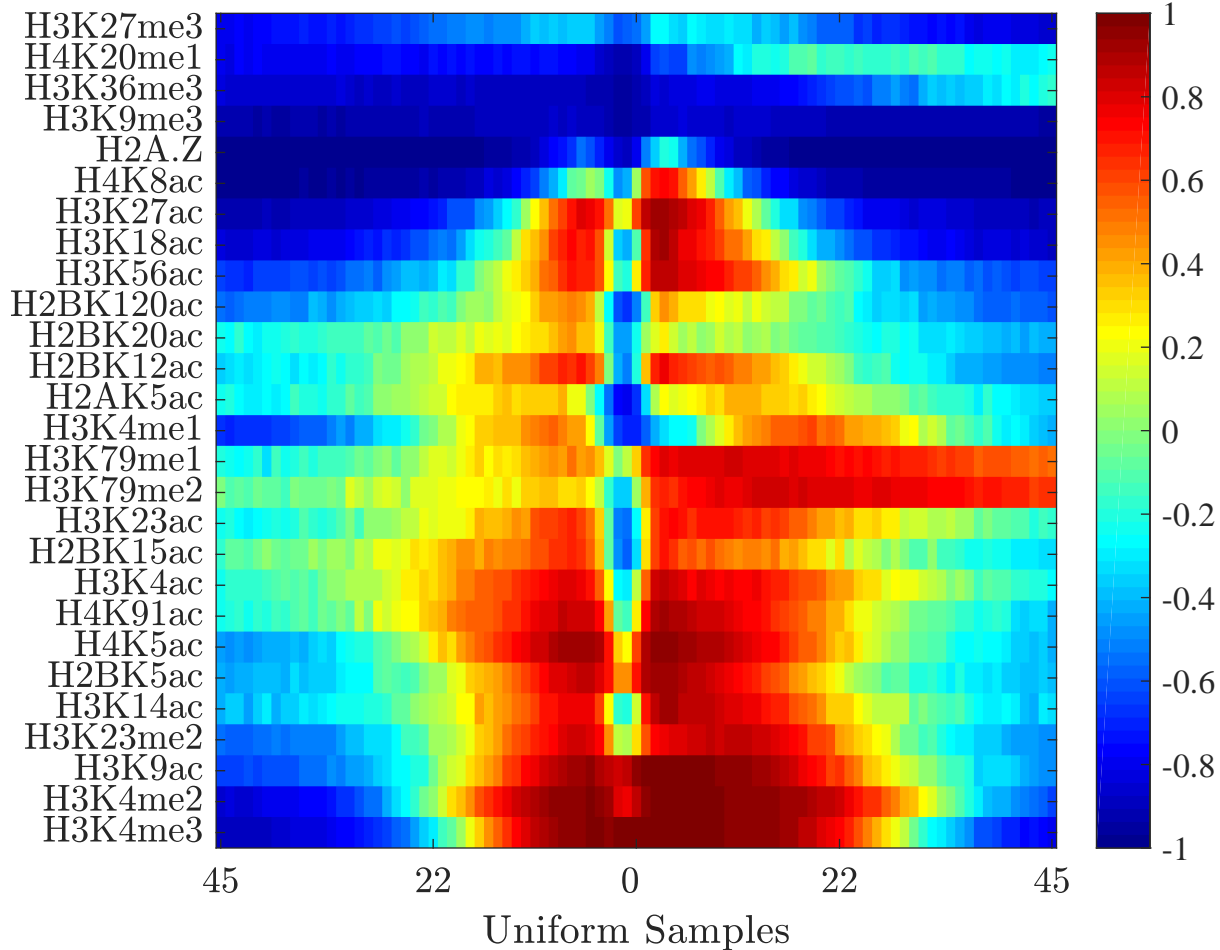

Supplement: Supplementary file 27 [file 12941978]

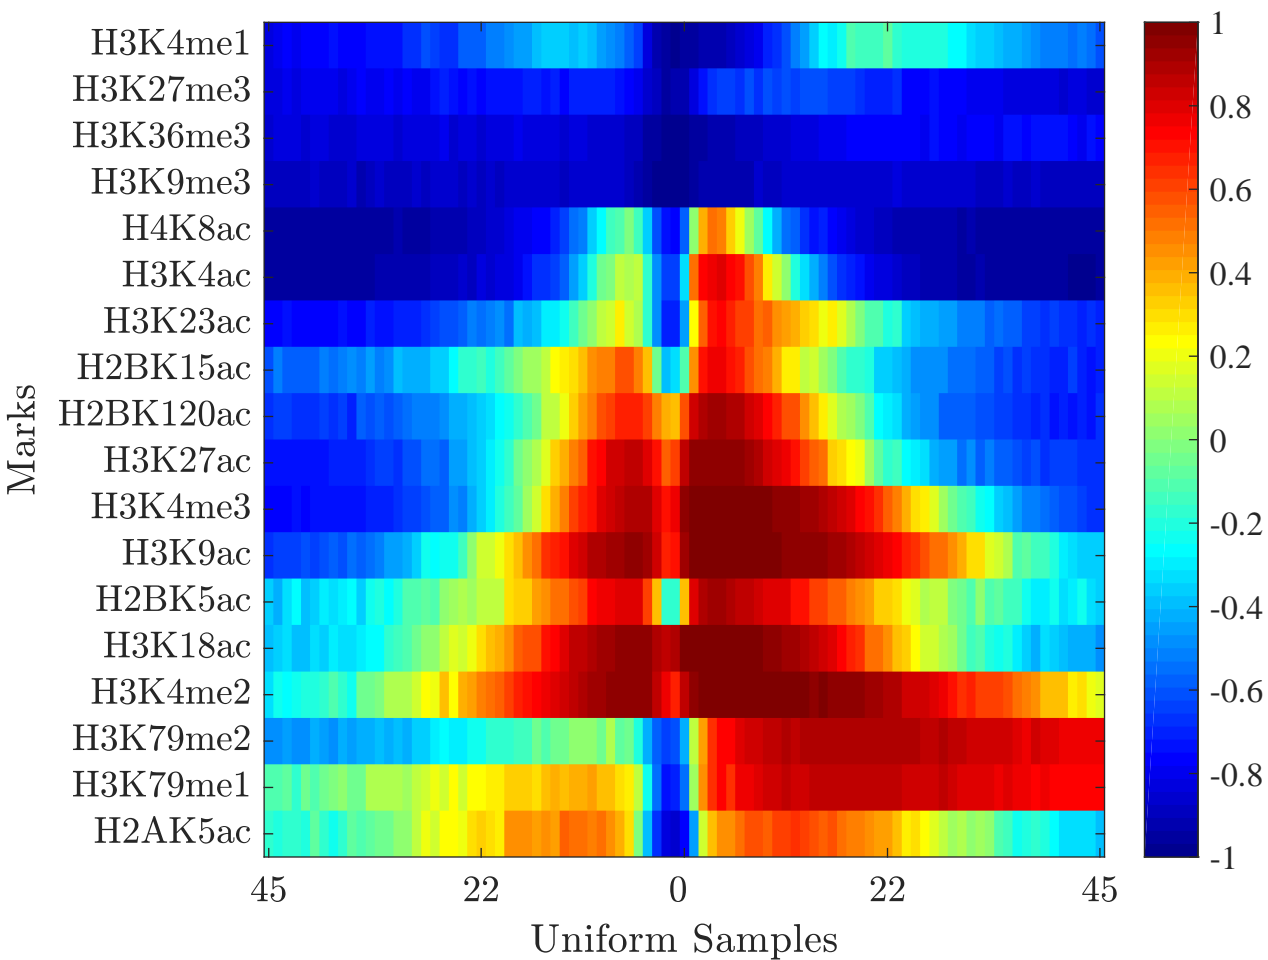

Supplement: Supplementary file 28 [file 12941978]

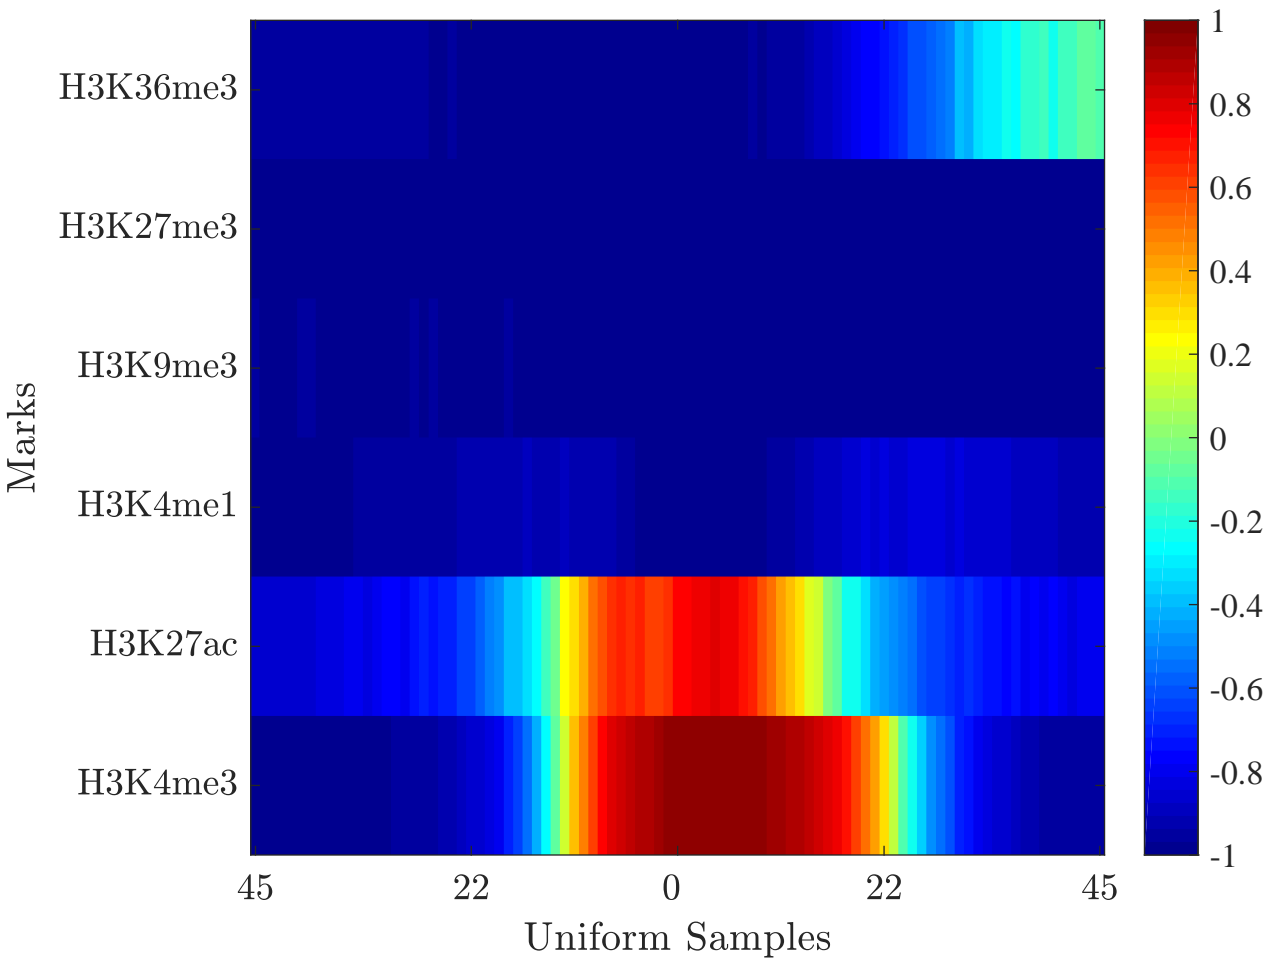

Supplement: Supplementary file 29 [file 12941978]

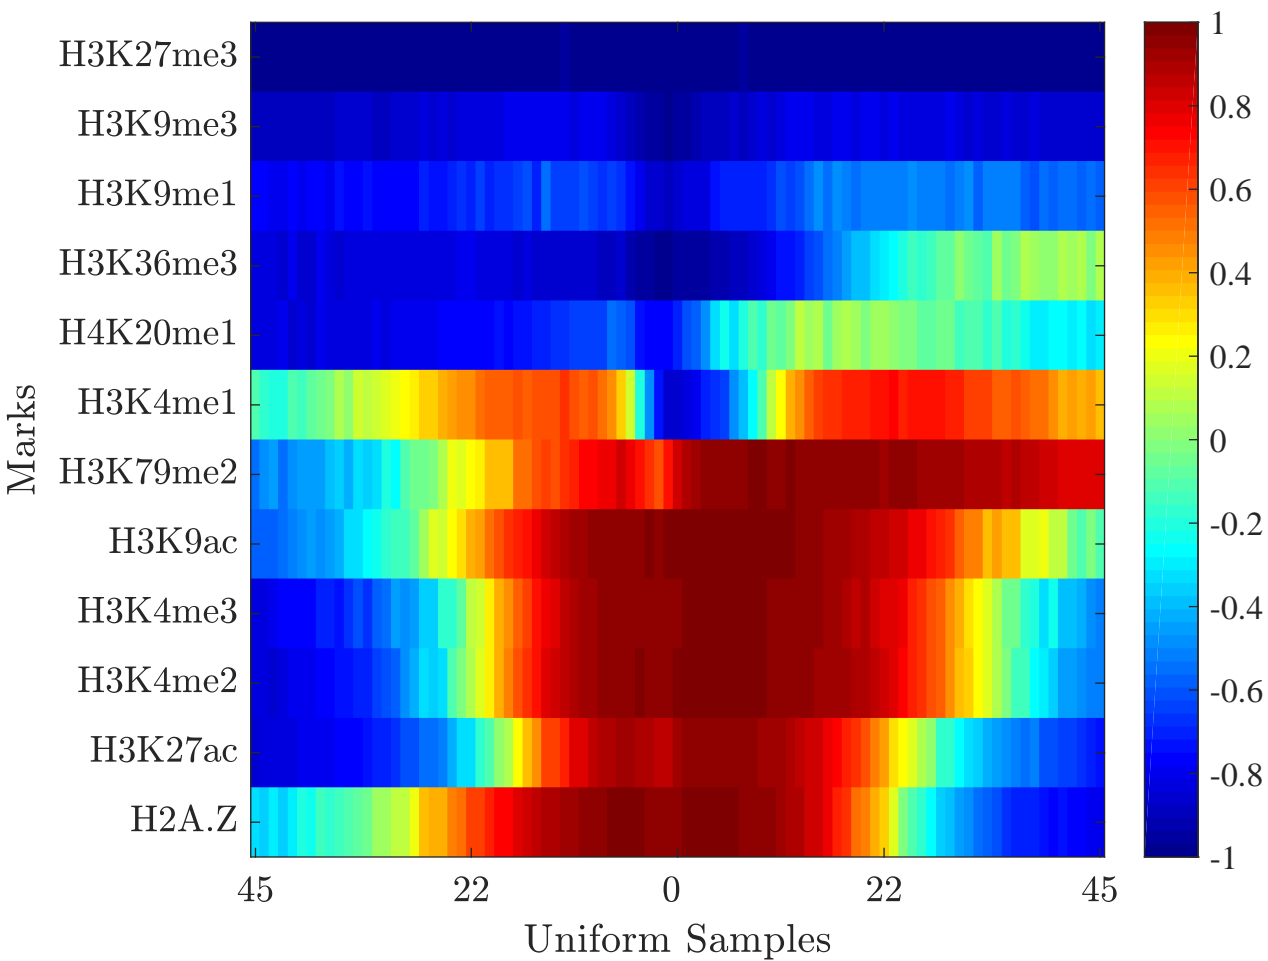

Supplement: Supplementary file 30 [file 12941978]

Marks

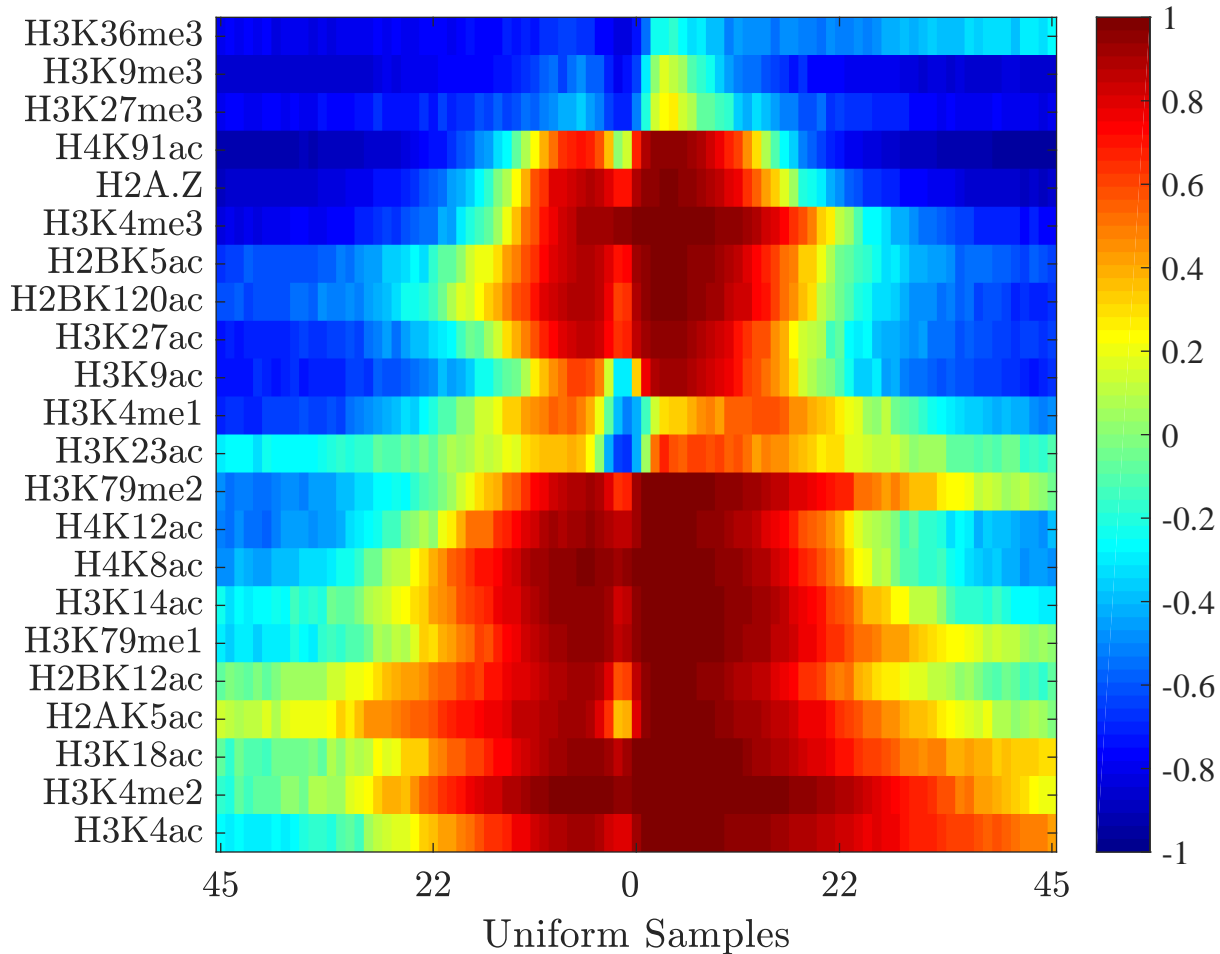

Supplement: Supplementary file 31 [file 12941978]

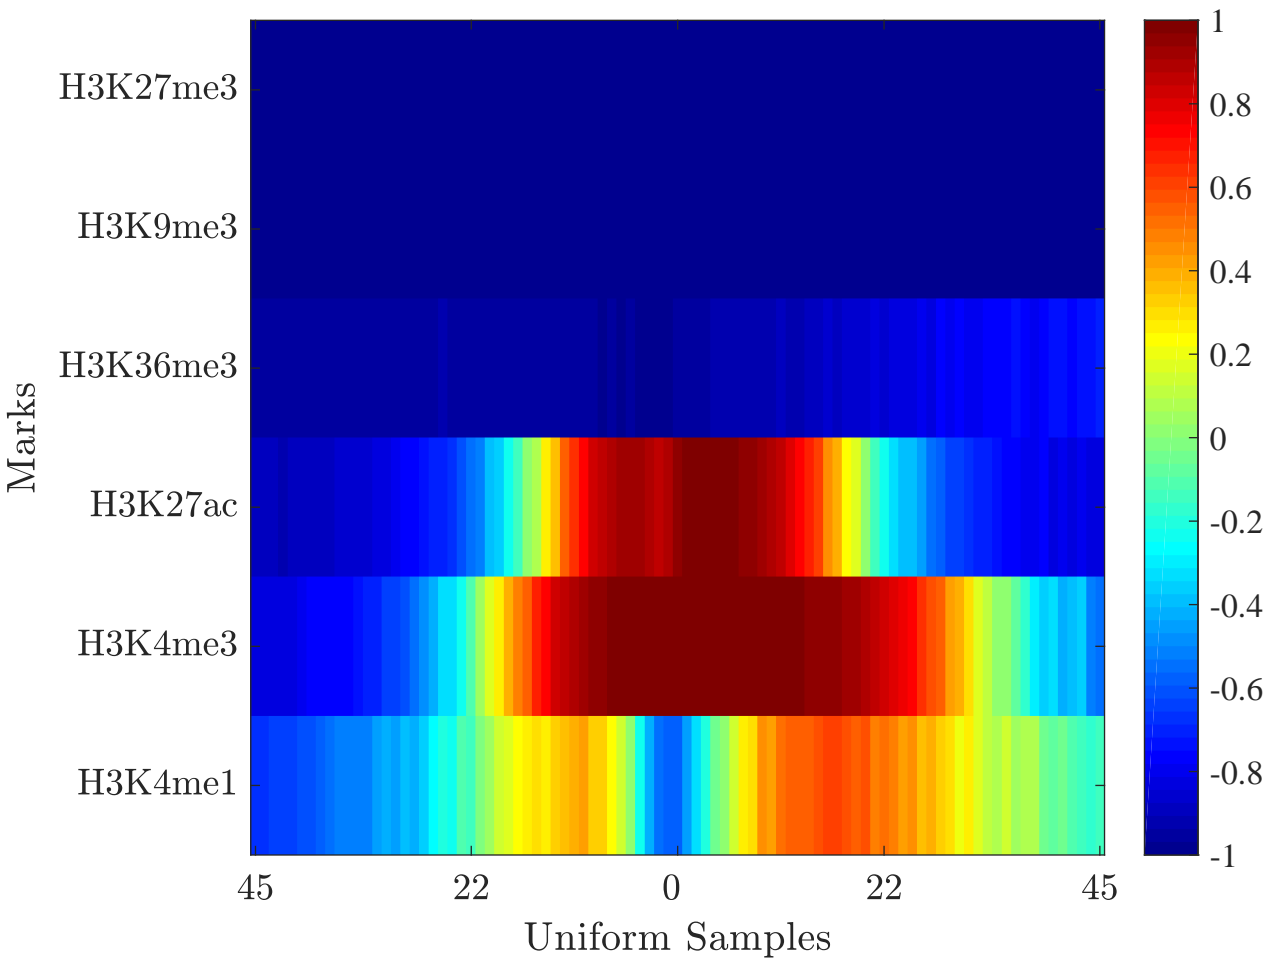

Supplement: Supplementary file 32 [file 12941978]

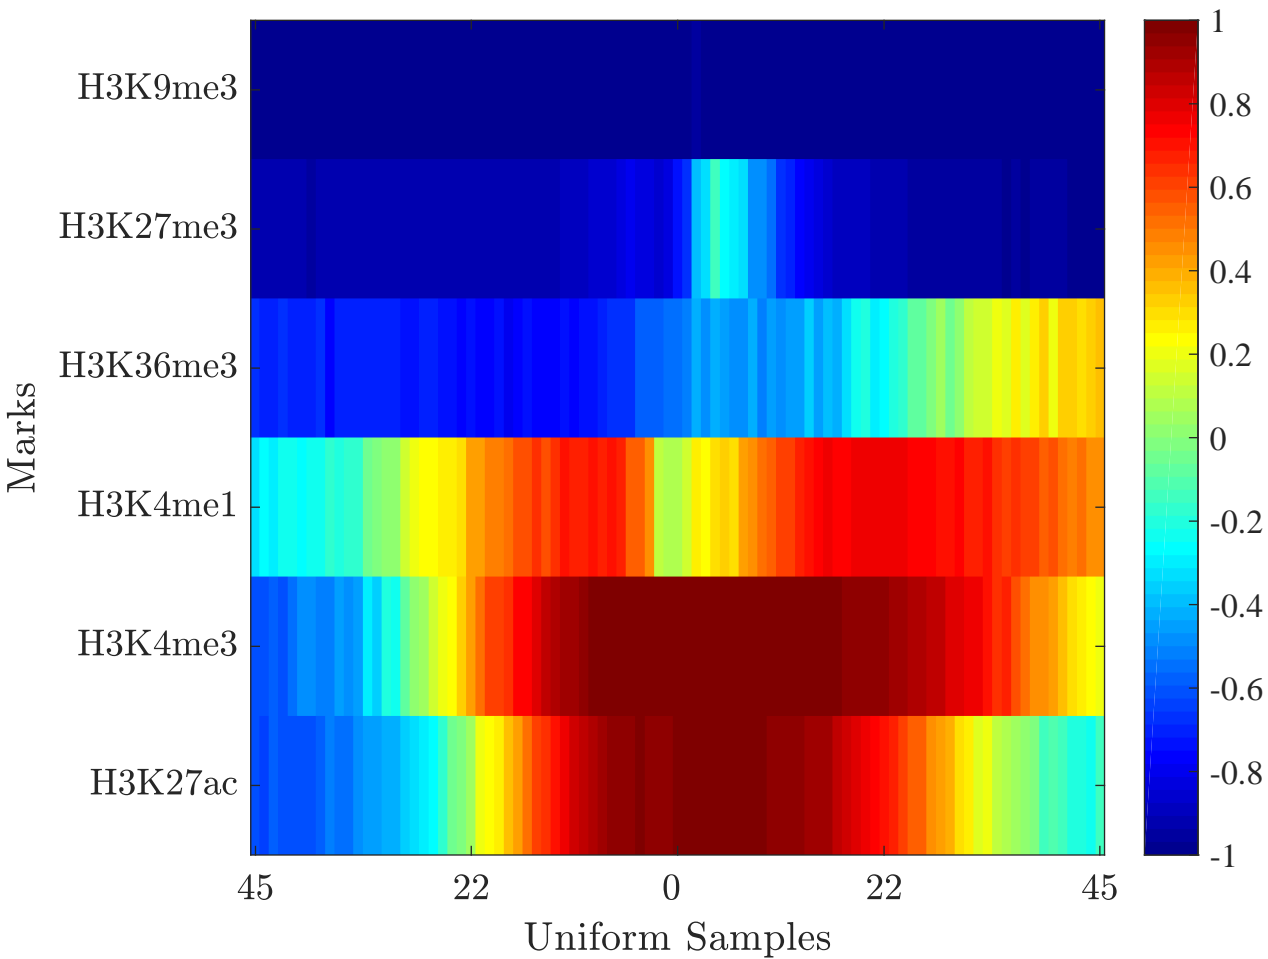

Supplement: Supplementary file 34 [file 12941978]

Marks

H3K36me3

H3K27me3

H3K9me3

H3K4me1

H3K9ac

H3K27ac

H3K4me3

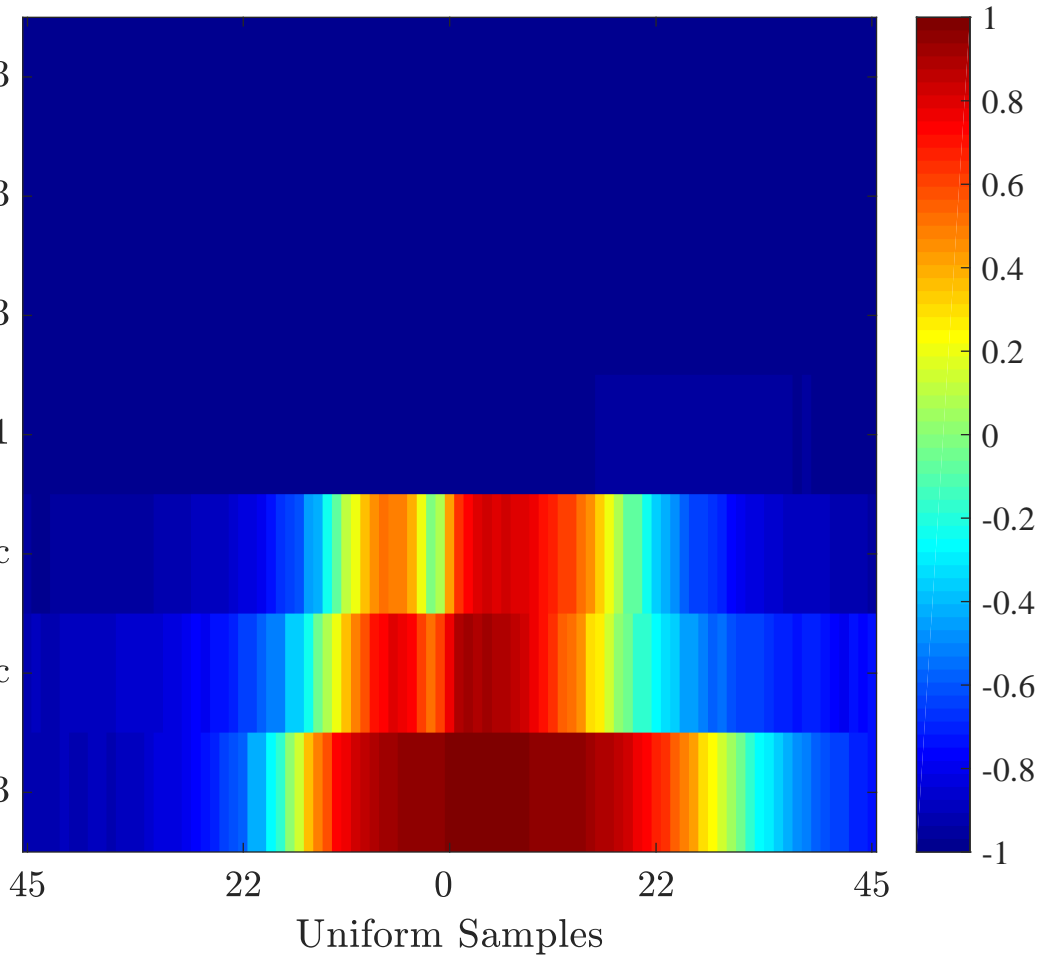

Supplement: Supplementary file 35 [file 12941978]

Marks

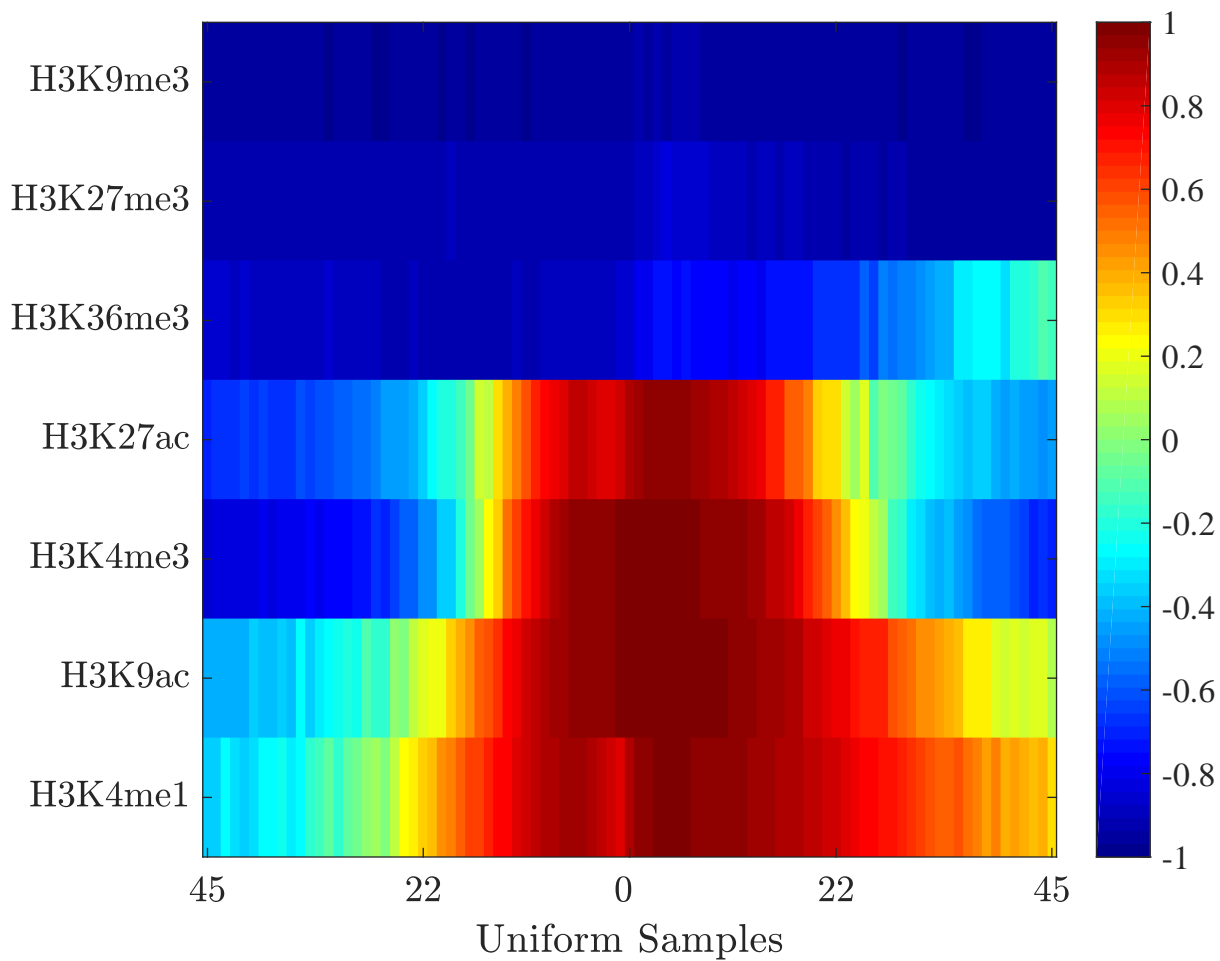

Supplement: Supplementary file 36 [file 12941978]

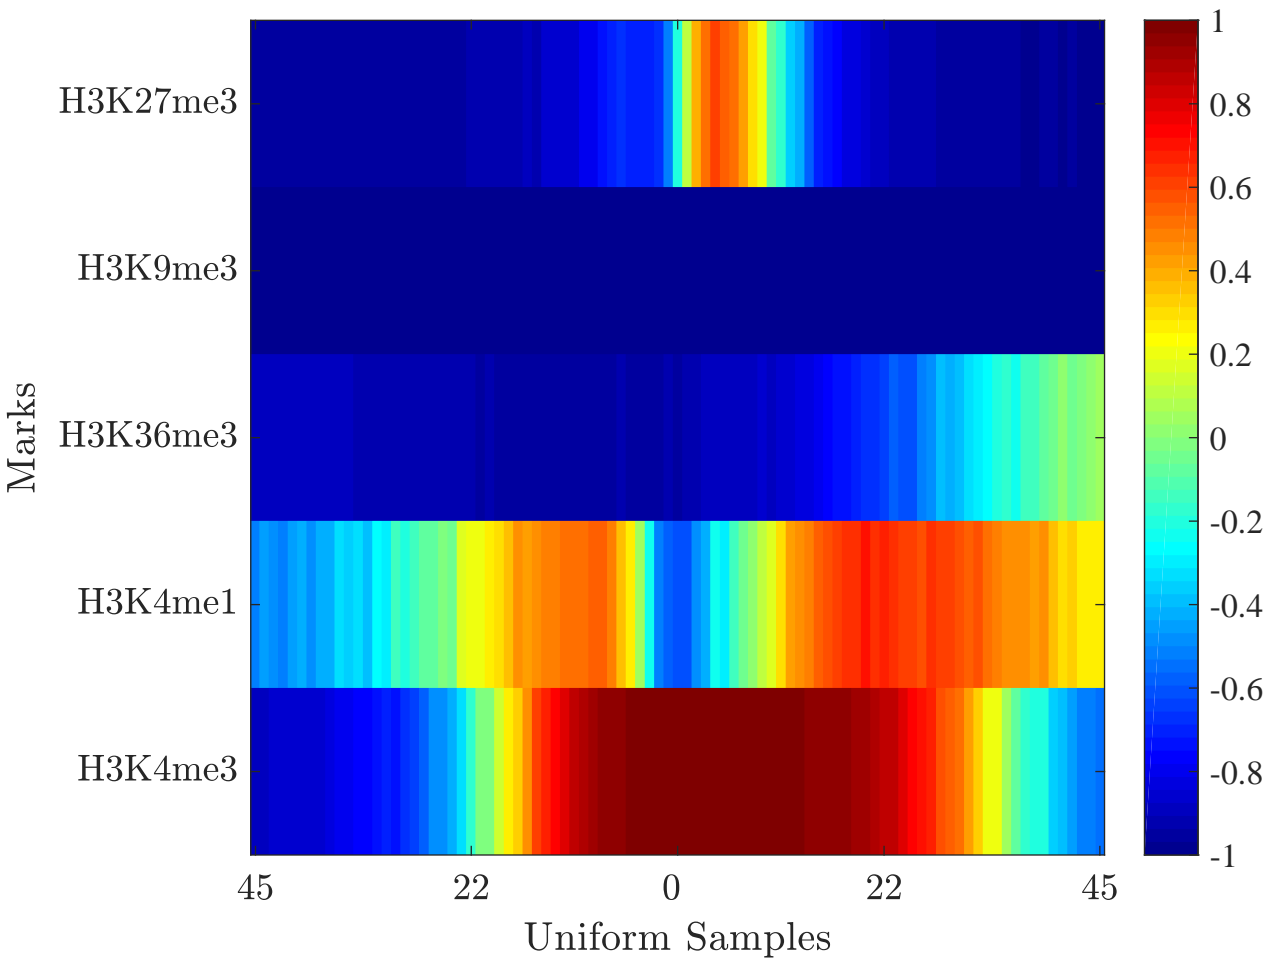

Supplement: Supplementary file 37 [file 12941978]

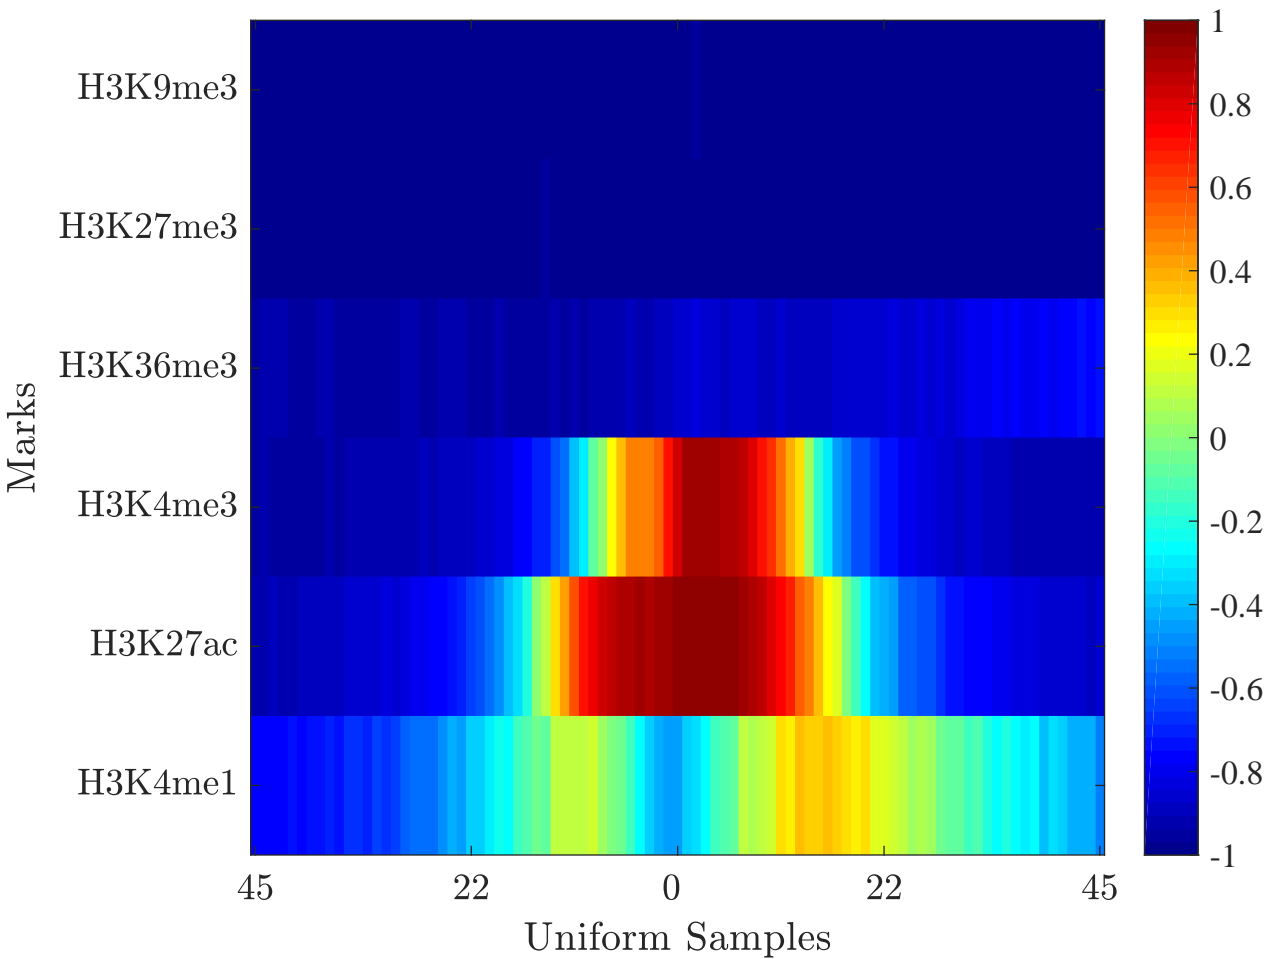

Supplement: Supplementary file 38 [file 12941978]

Marks

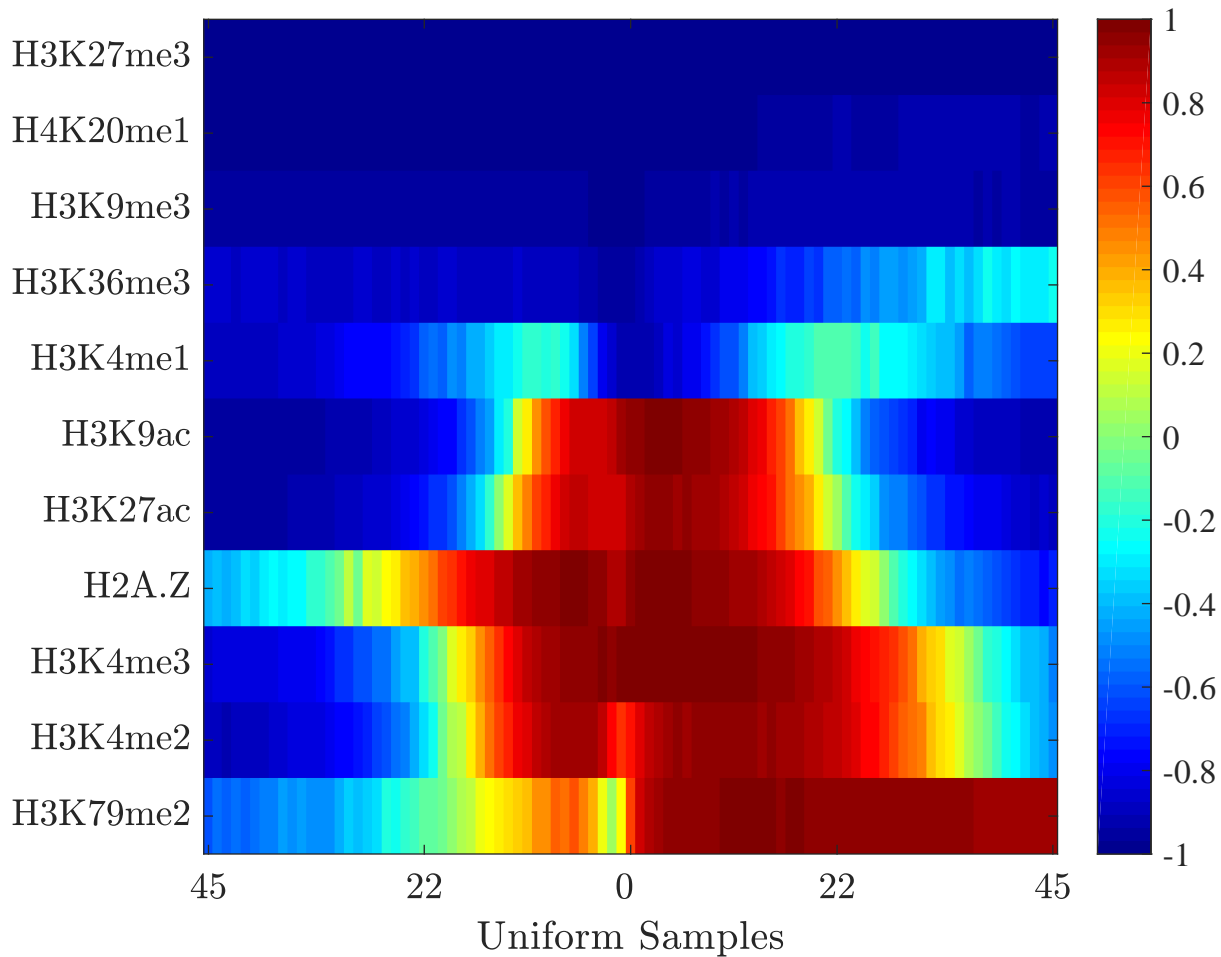

Supplement: Supplementary file 39 [file 12941978]

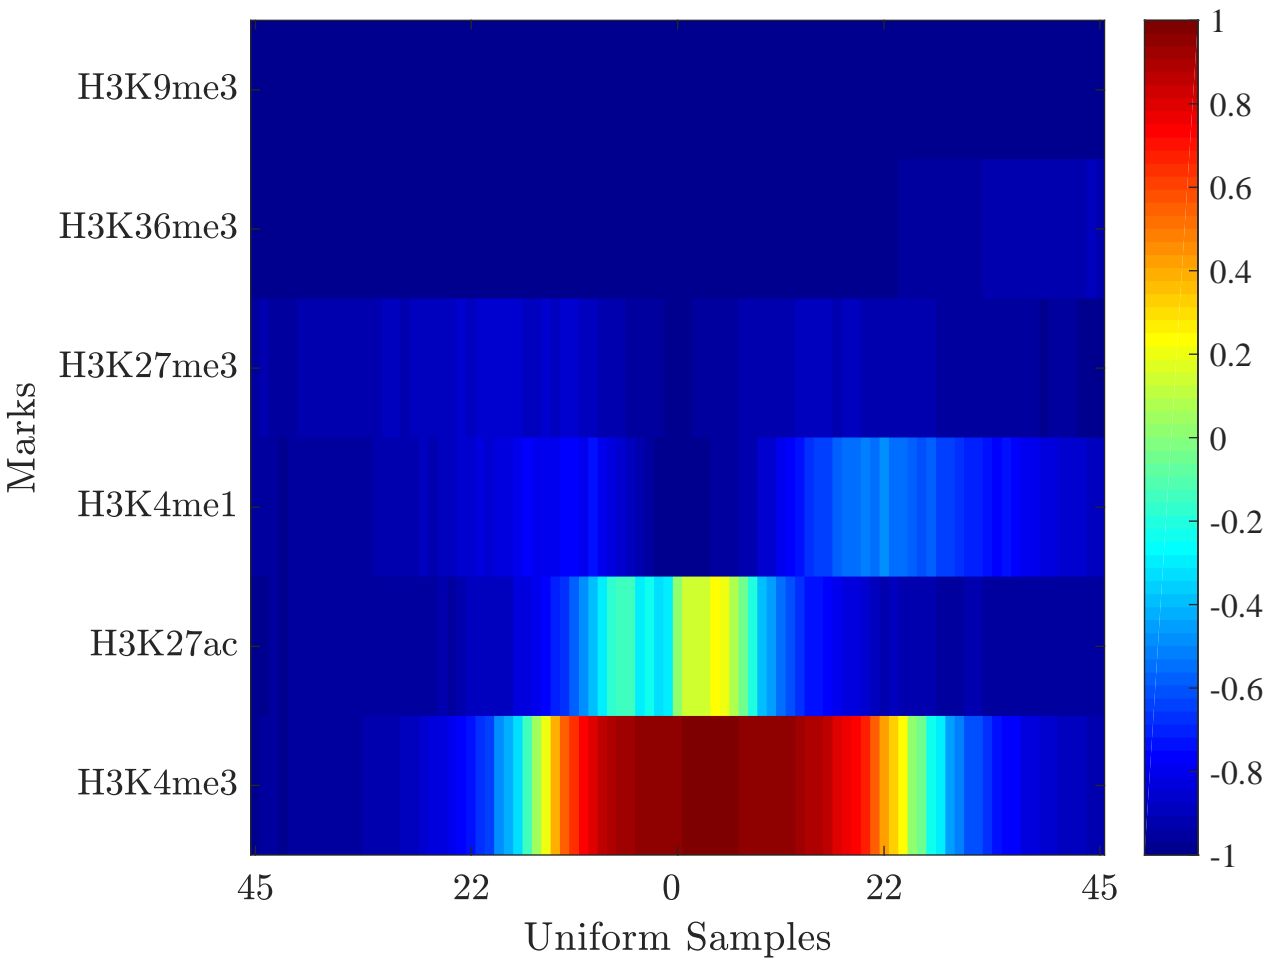

Supplement: Supplementary file 40 [file 12941978]

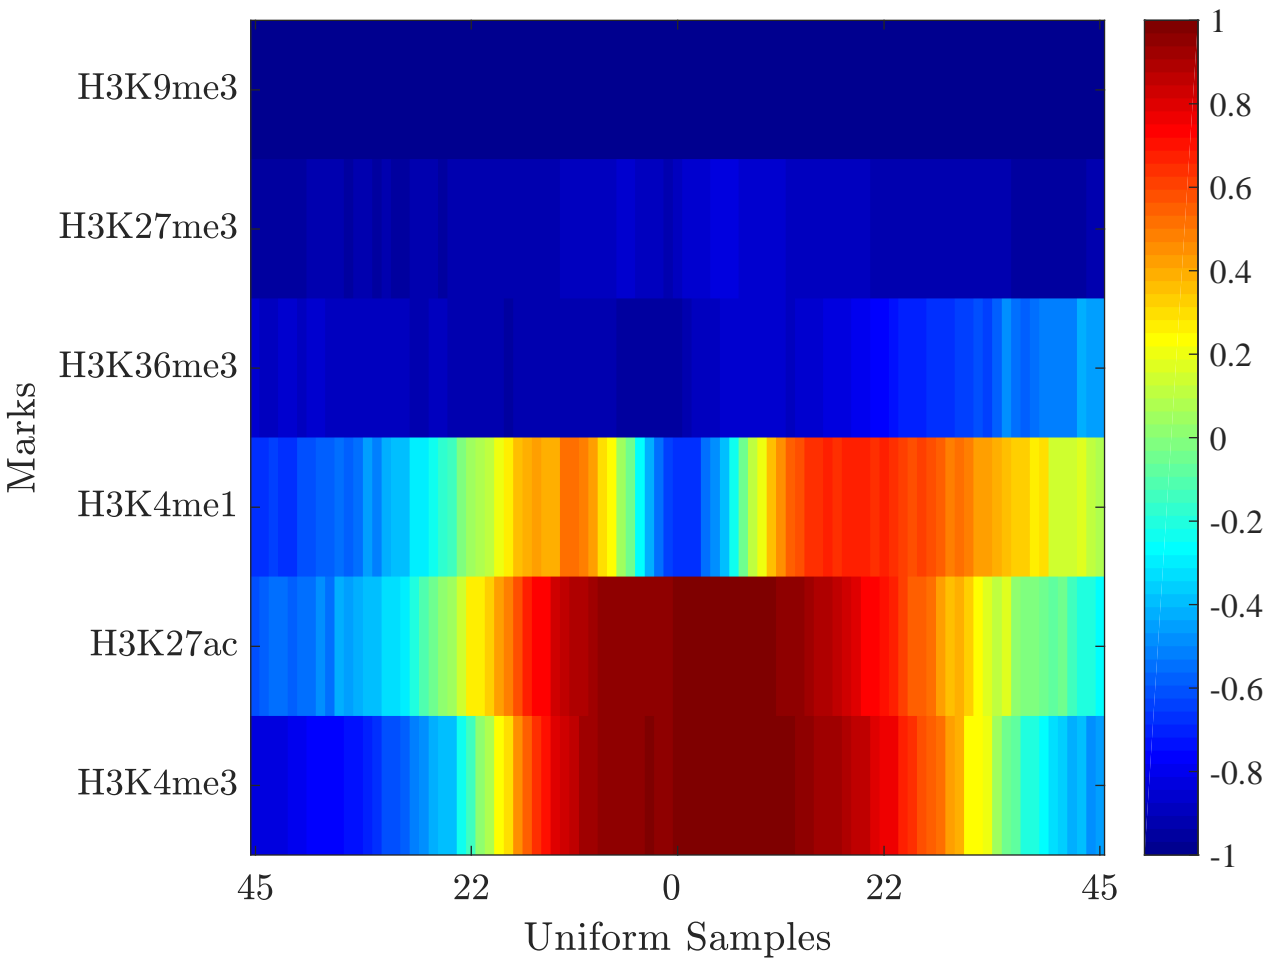

Supplement: Supplementary file 42 [file 12941978]

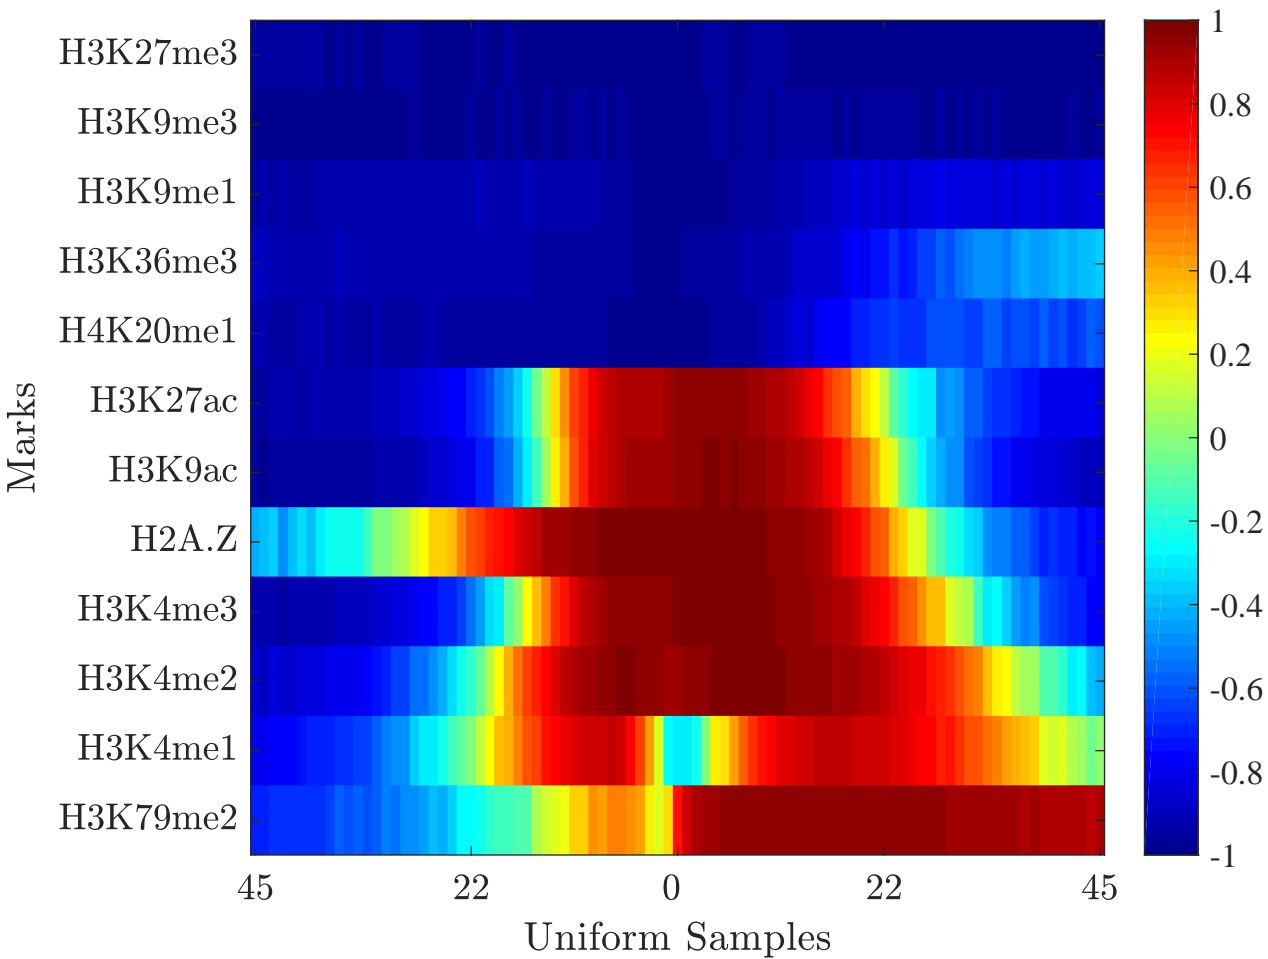

Supplement: Supplementary file 43 [file 12941978]

Marks

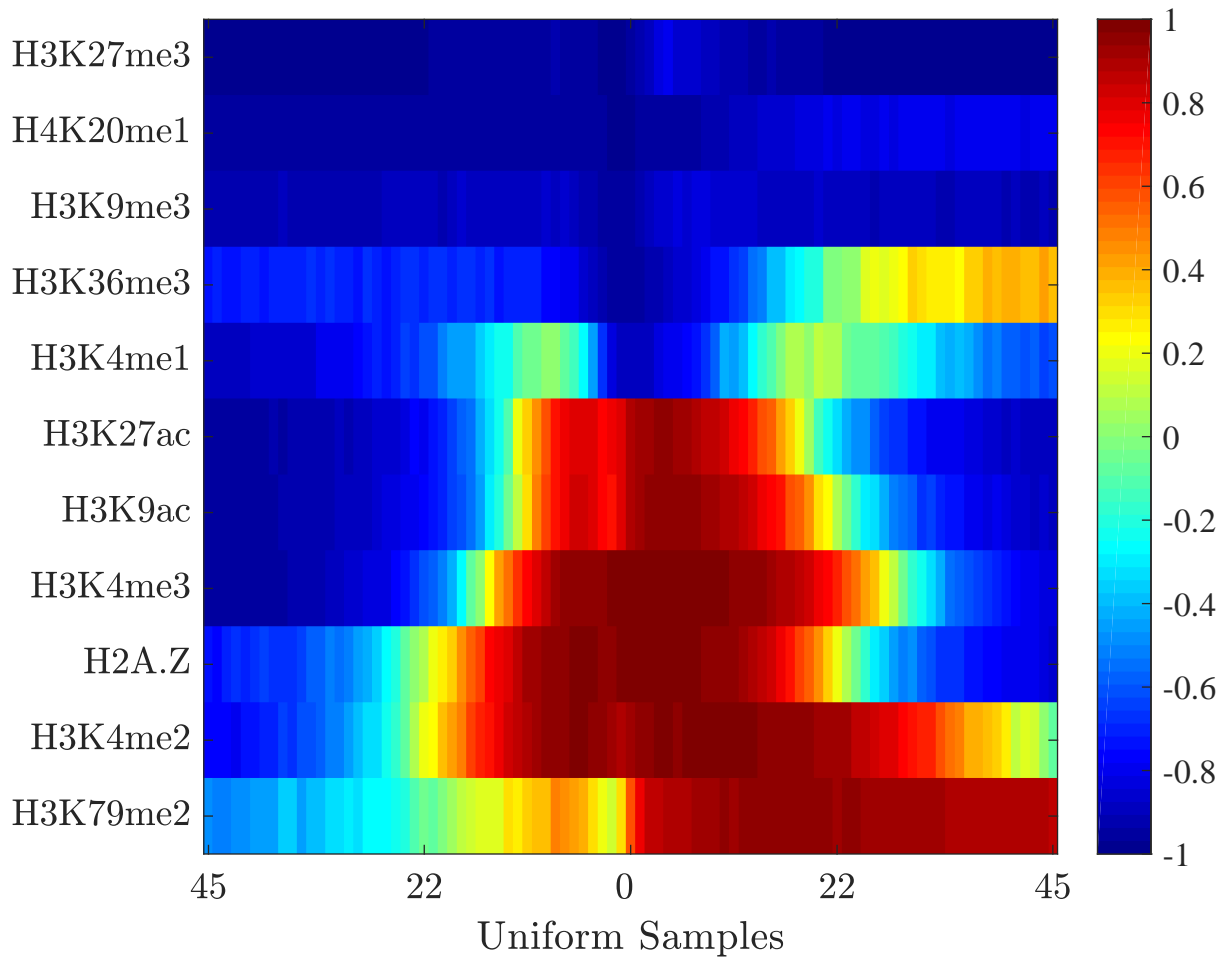

Supplement: Supplementary file 44 [file 12941978]

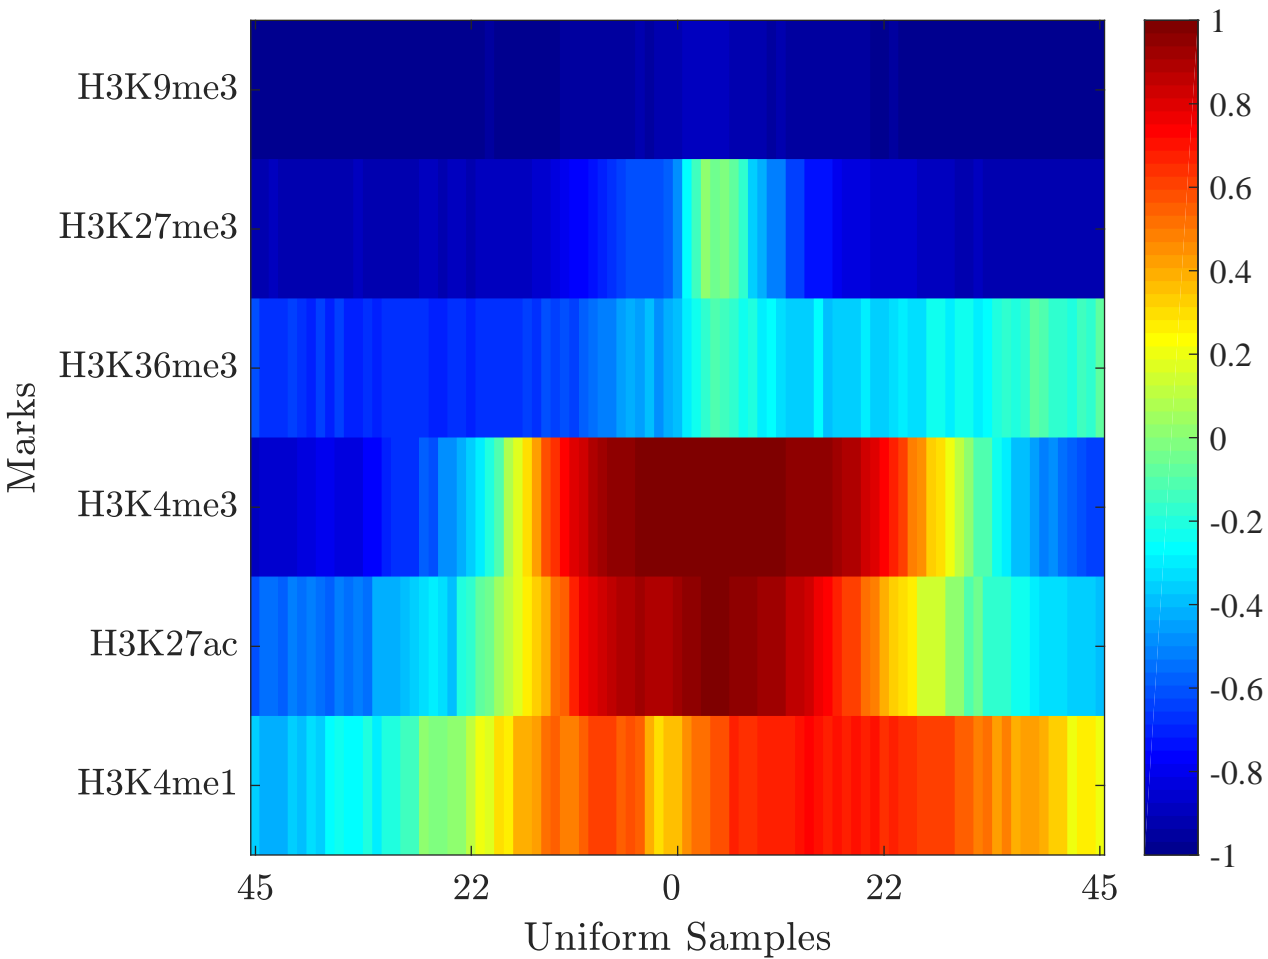

Supplement: Supplementary file 45 [file 12941978]

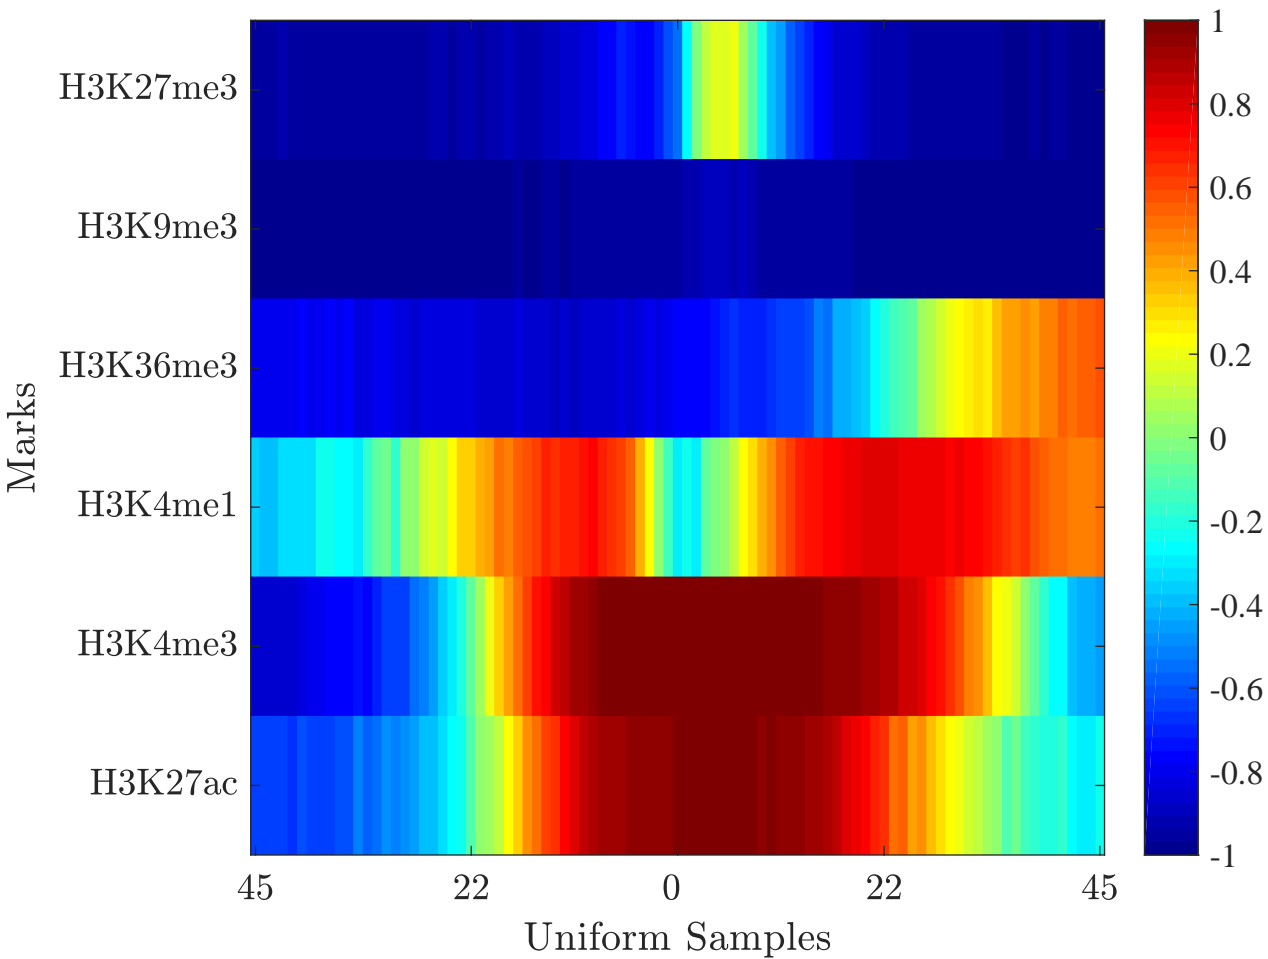

Supplement: Supplementary file 47 [file 12941978]

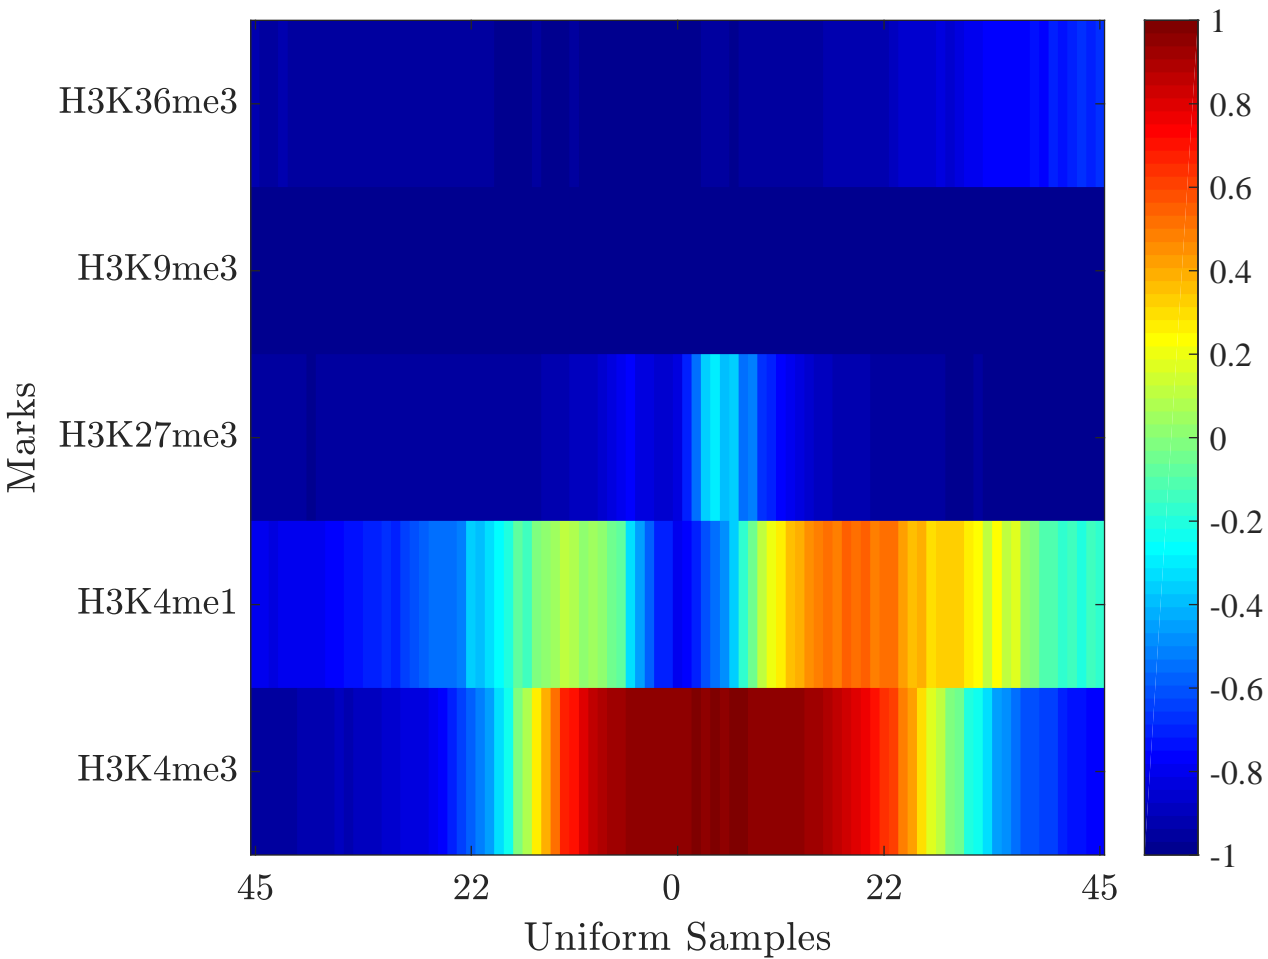

Supplement: Supplementary file 48 [file 12941978]

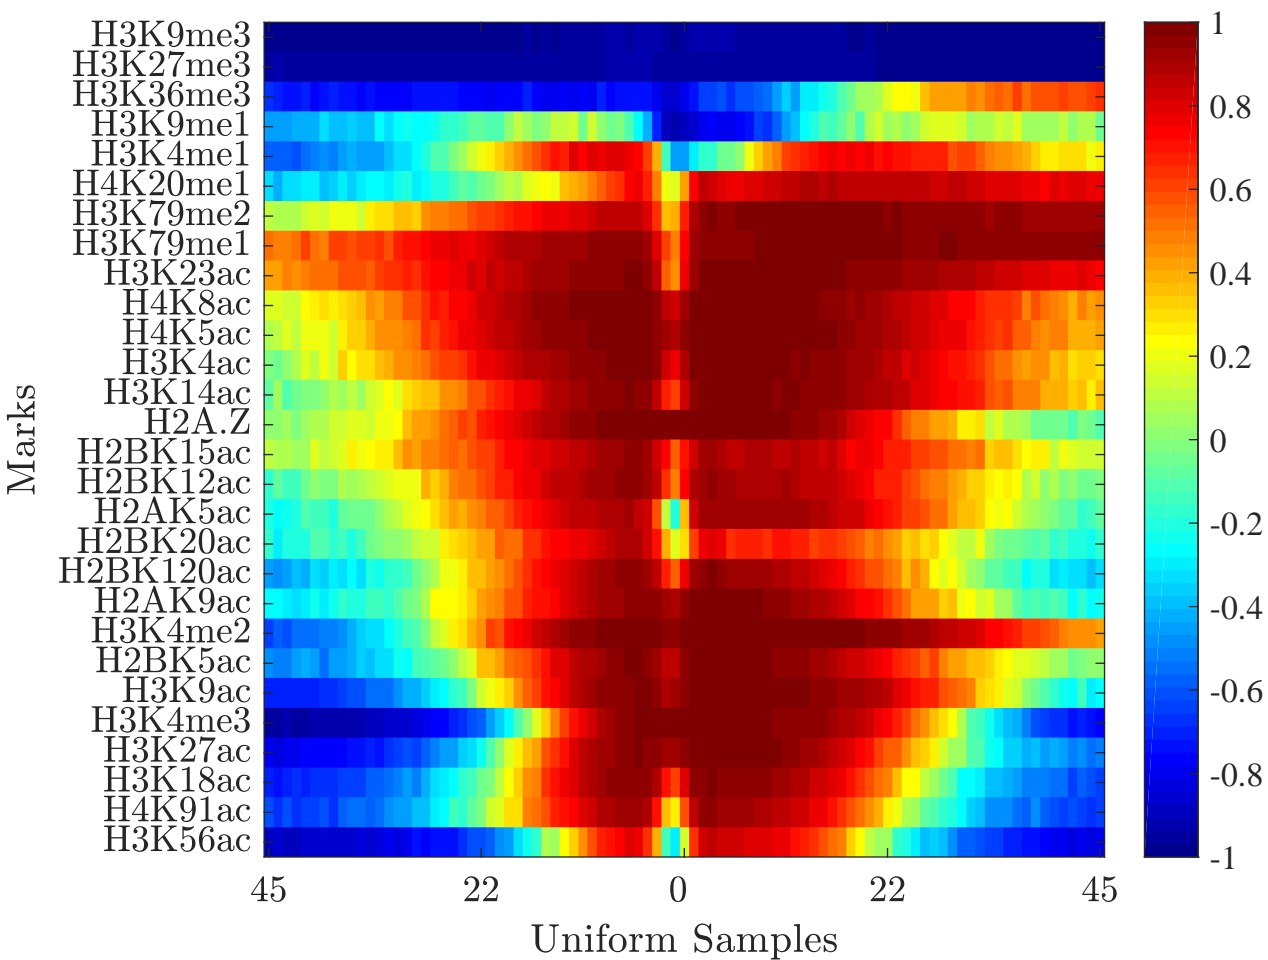

Supplement: Supplementary file 49 [file 12941978]

Marks

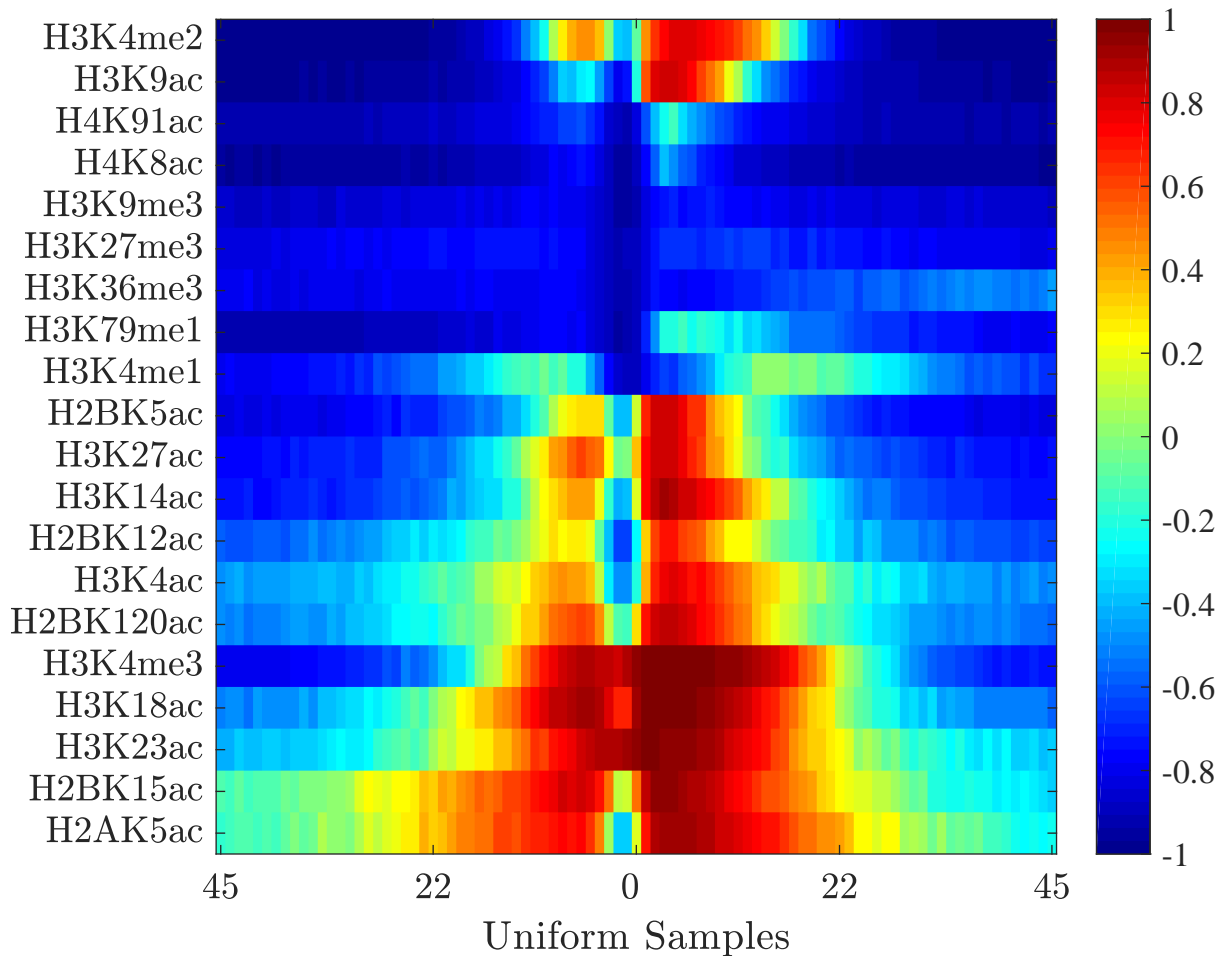

Supplement: Supplementary file 50 [file 12941978]

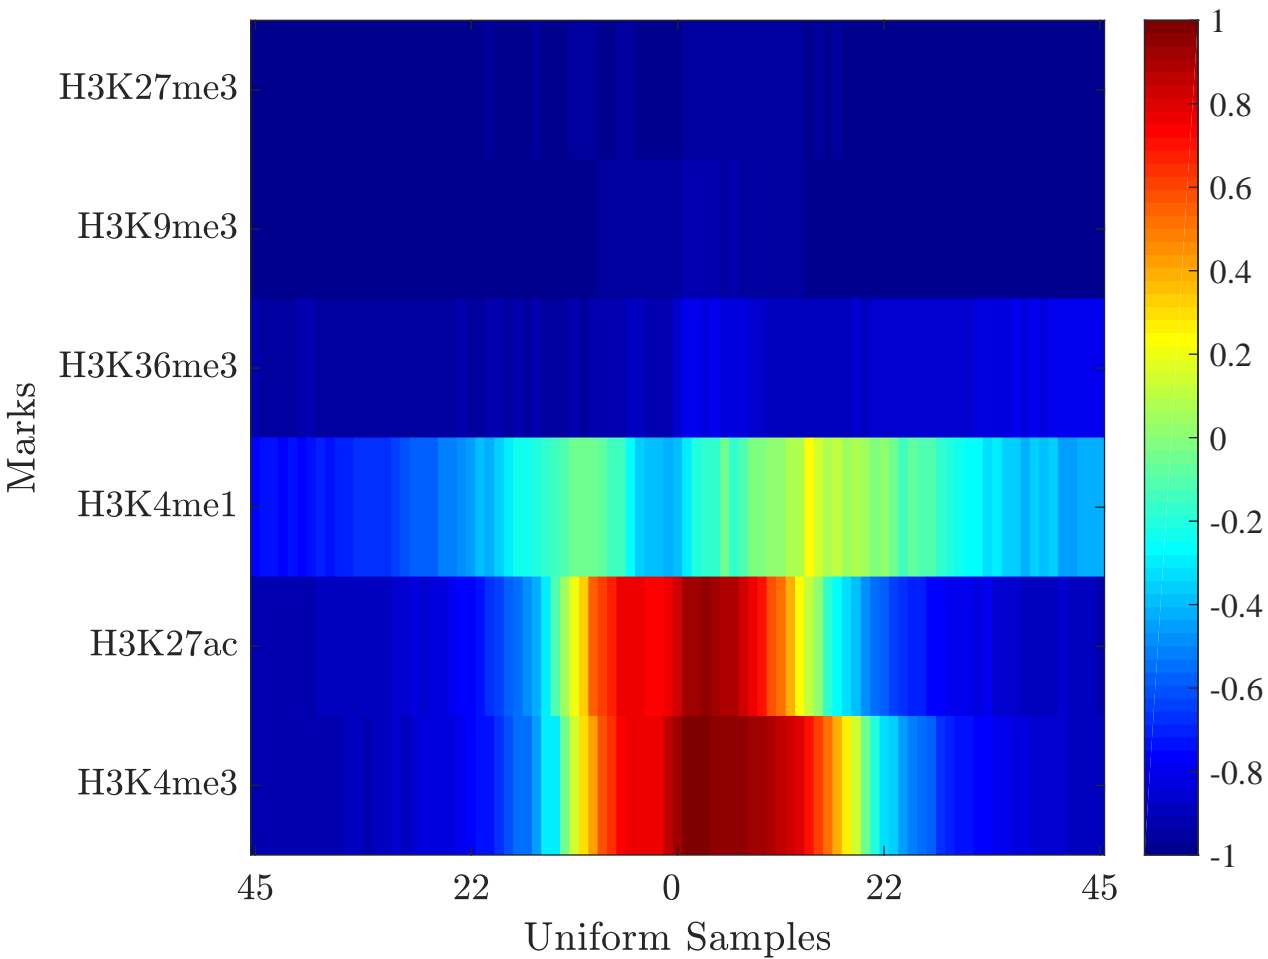

Supplement: Supplementary file 51 [file 12941978]

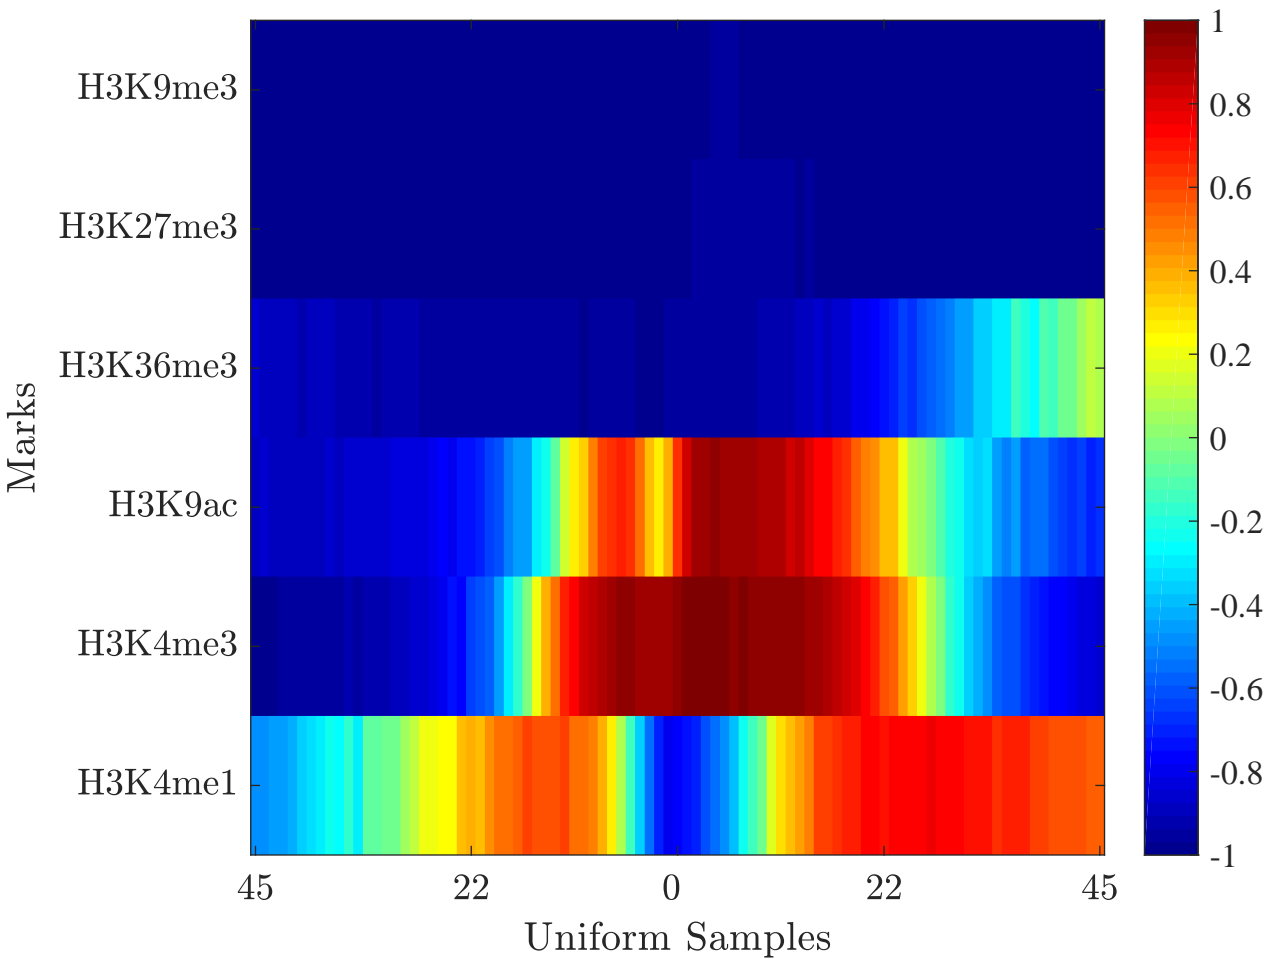

Supplement: Supplementary file 52 [file 12941978]

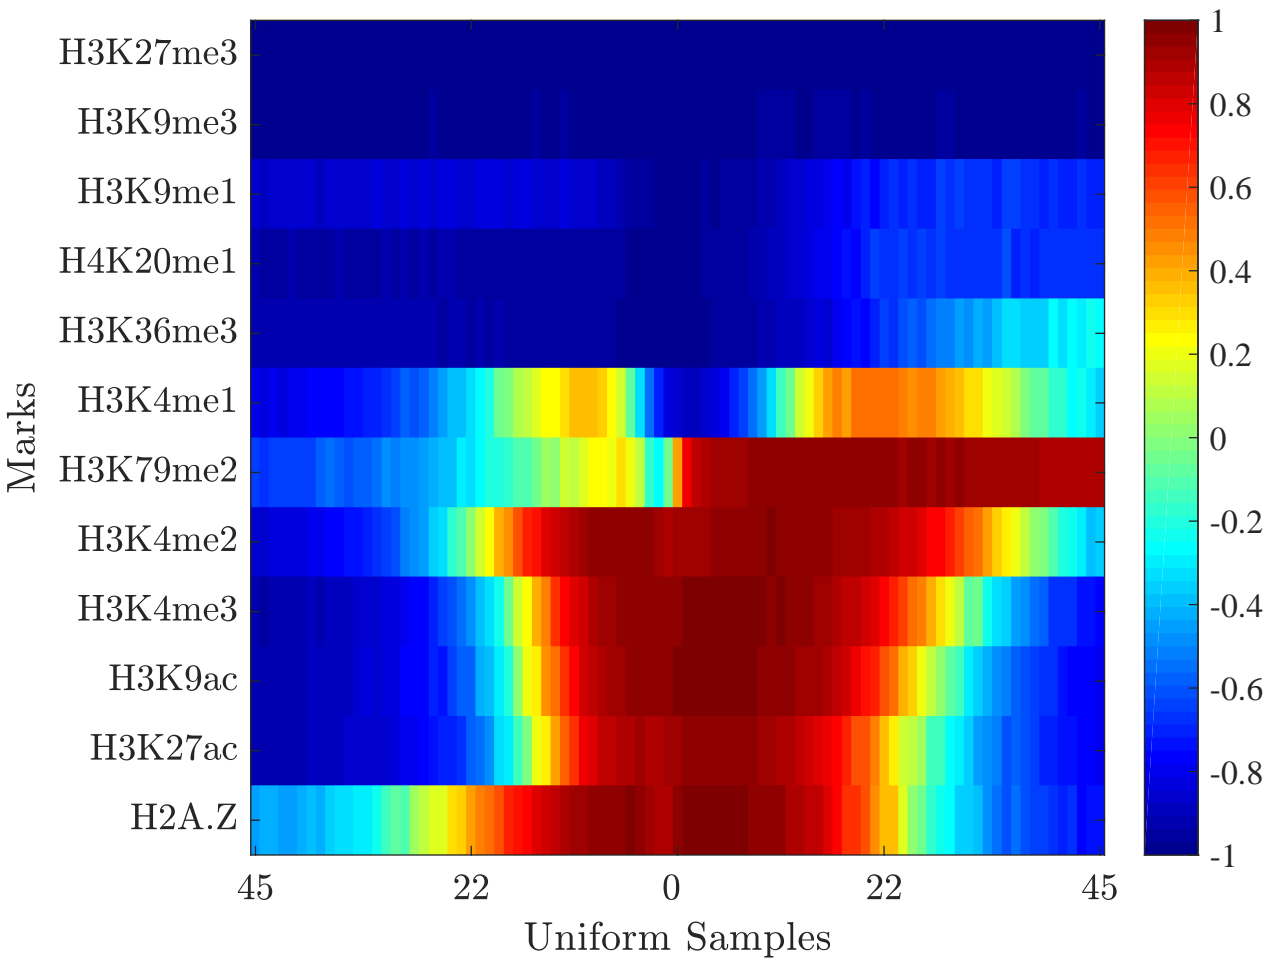

Supplement: Supplementary file 53 [file 12941978]

Marks

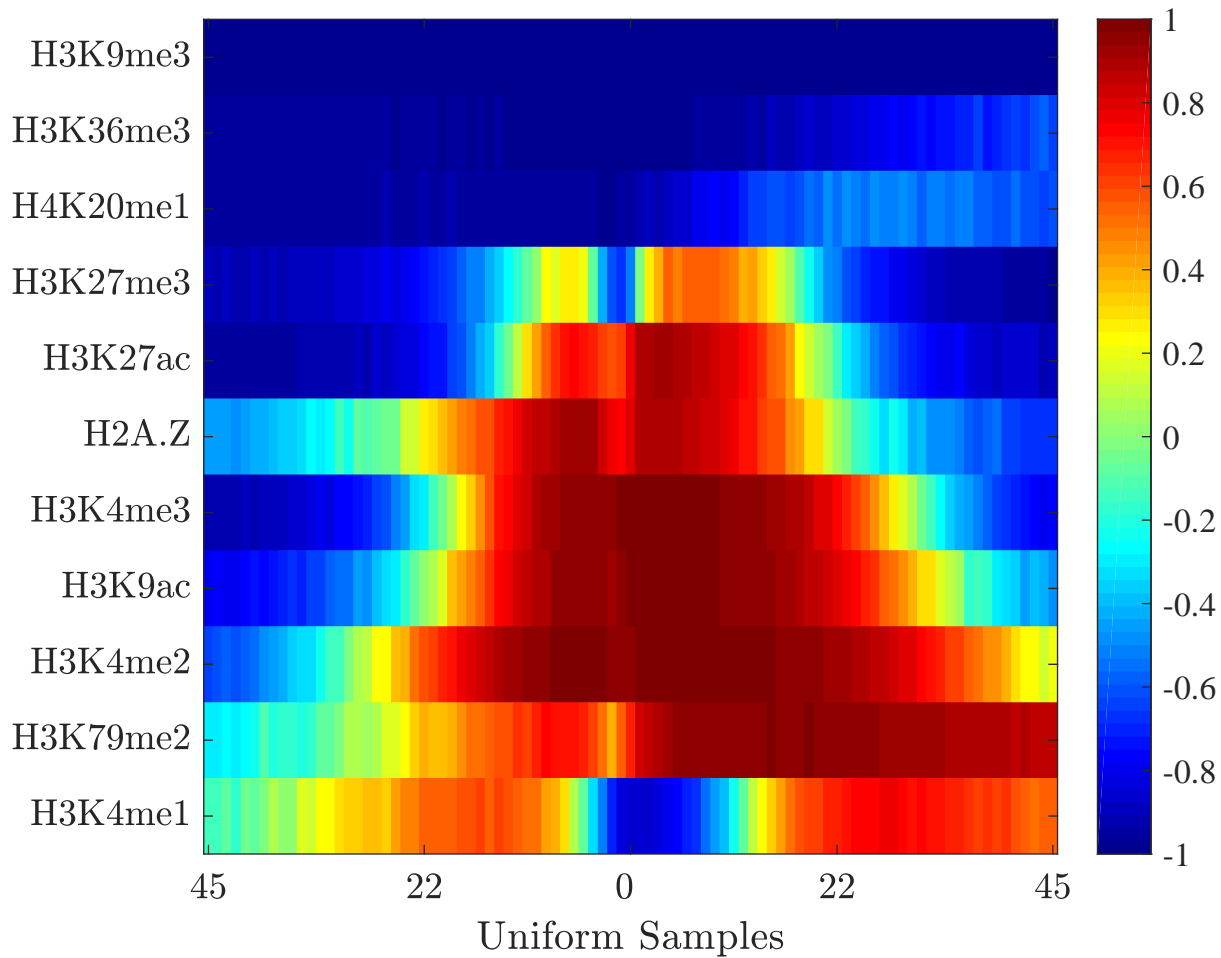

Supplement: Supplementary file 54 [file 12941978]

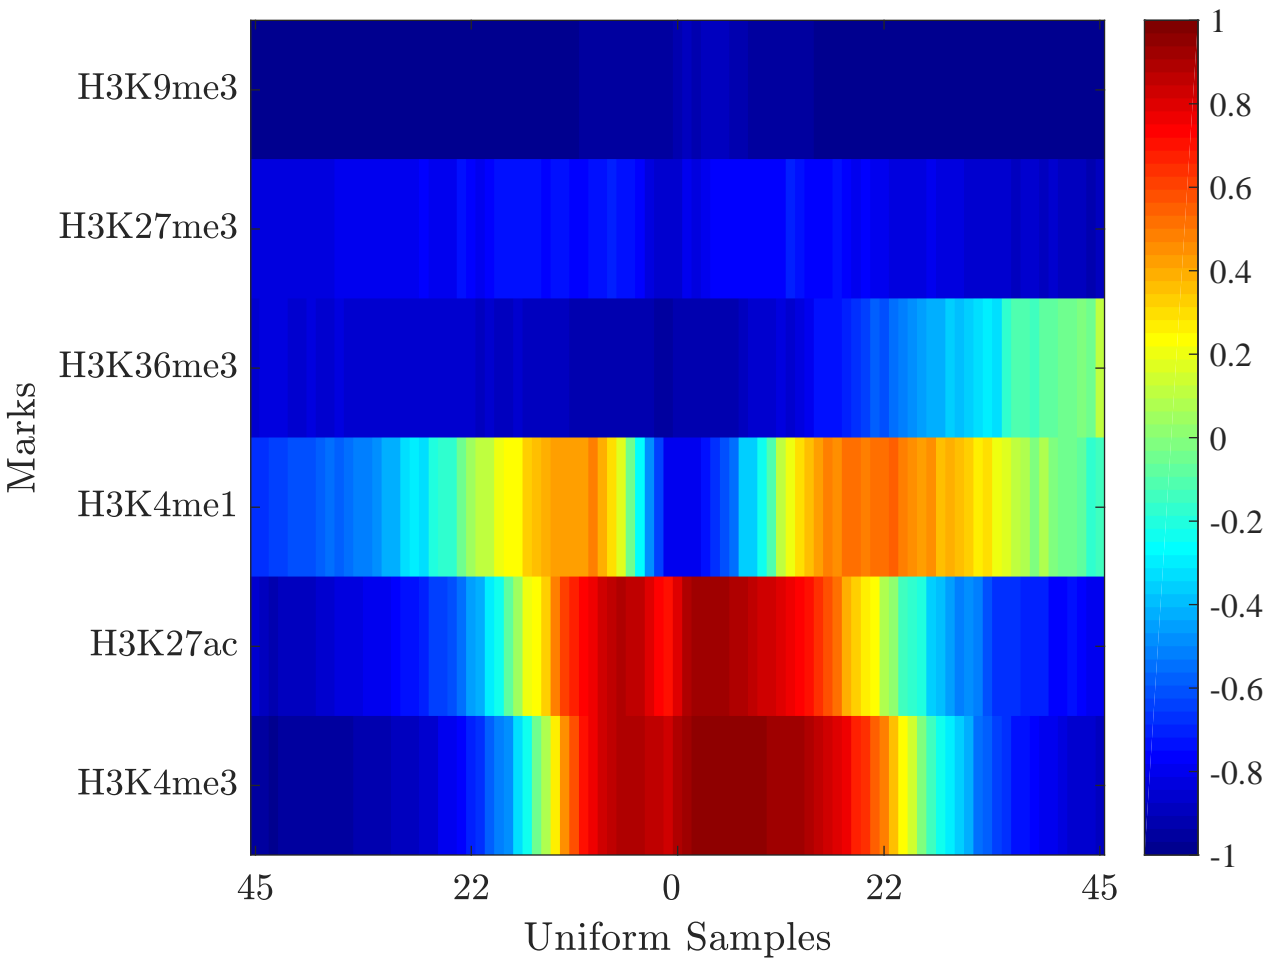

Supplement: Supplementary file 55 [file 12941978]

Marks

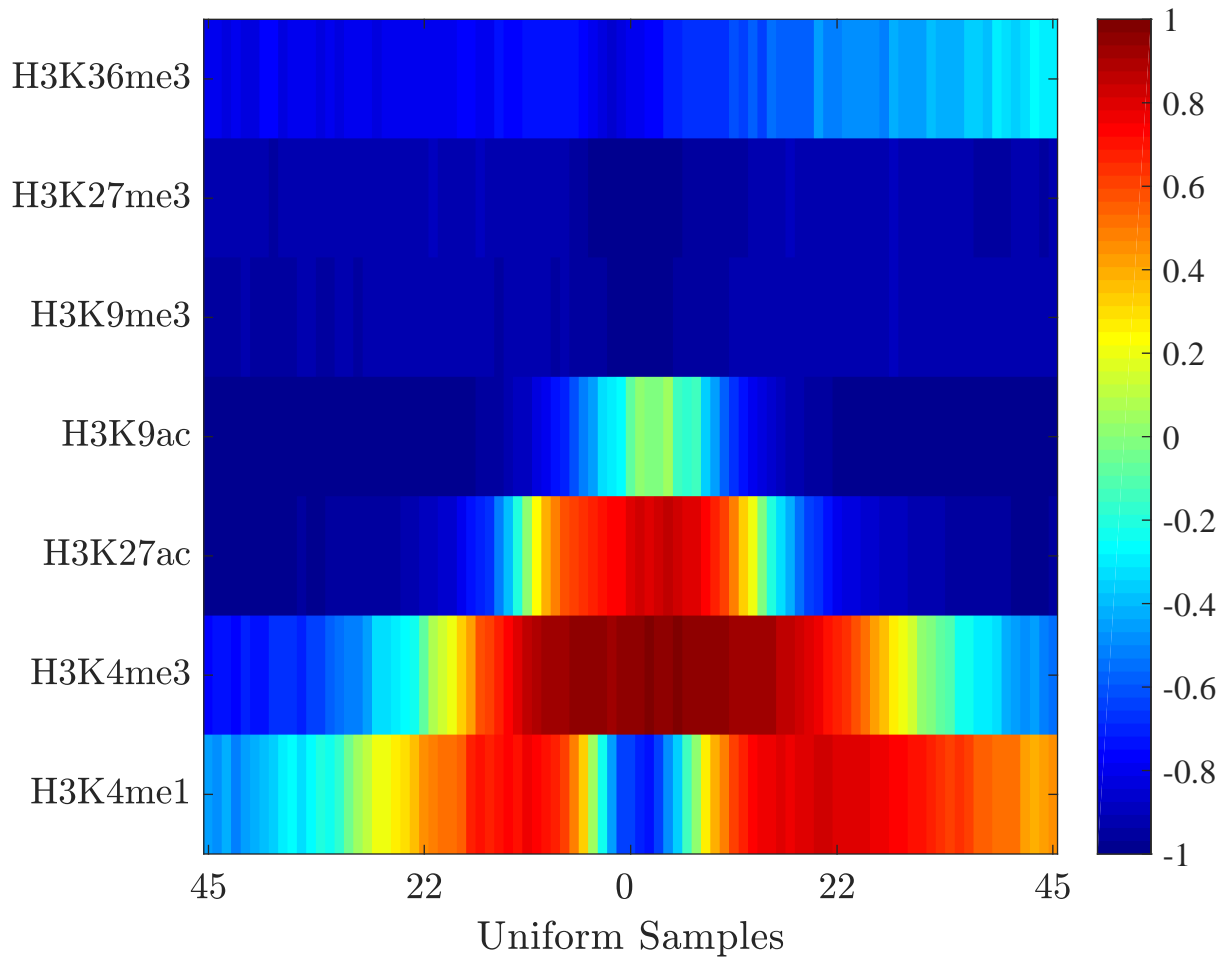

Supplement: Supplementary file 56 [file 12941978]

Marks

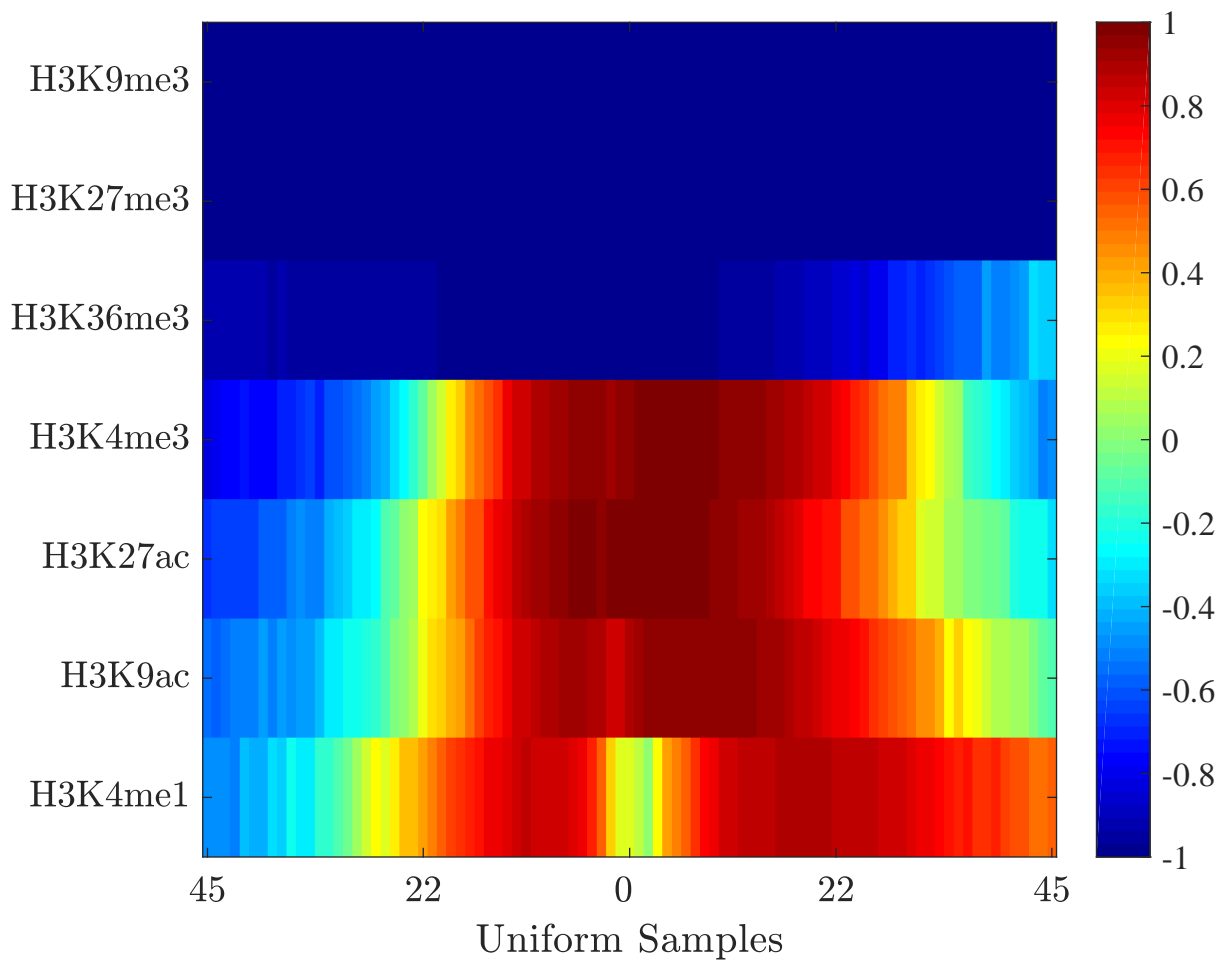

Supplement: Supplementary file 57 [file 12941978]

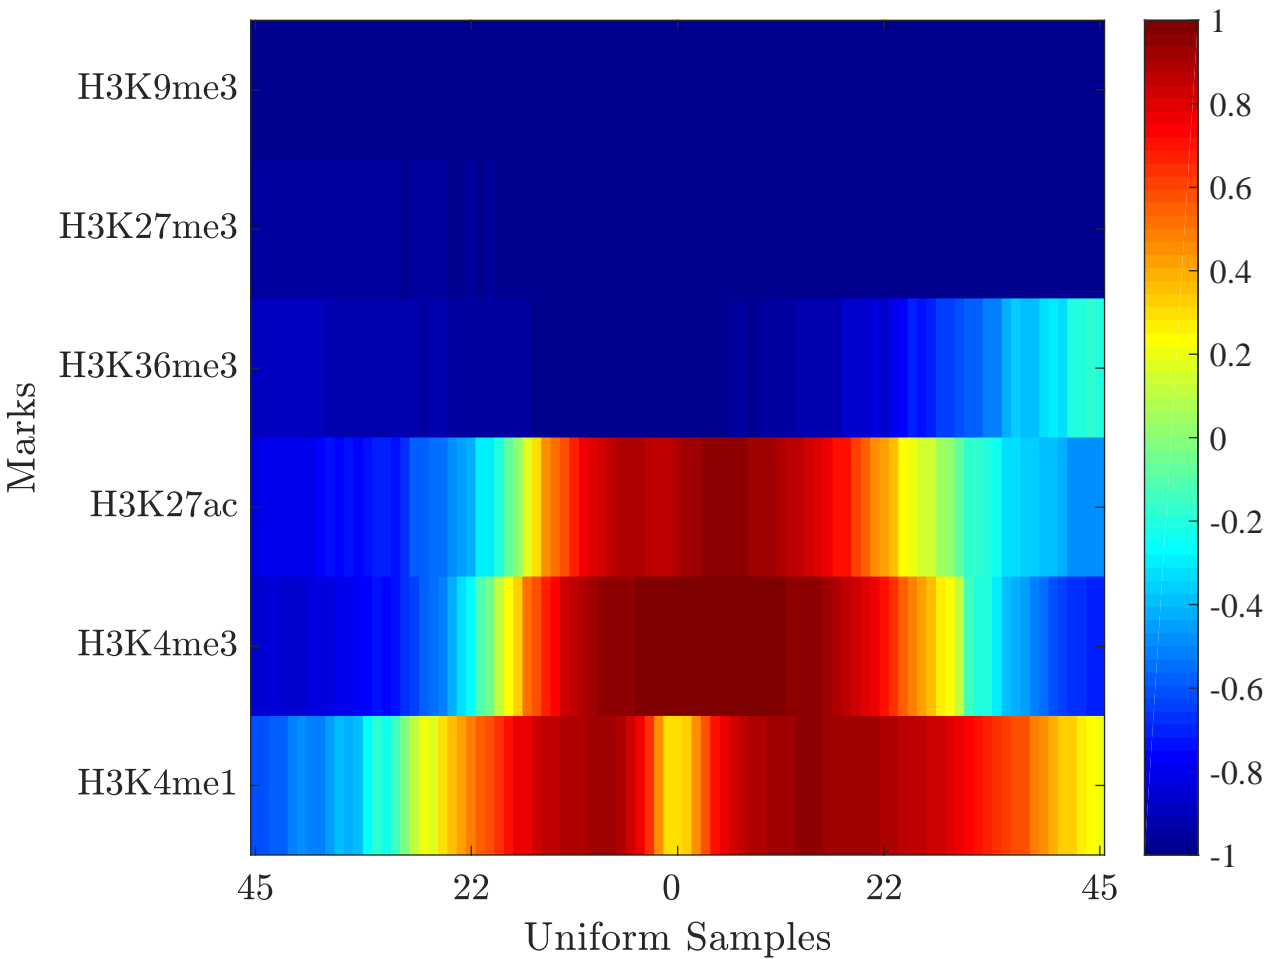

Supplement: Supplementary file 58 [file 12941978]

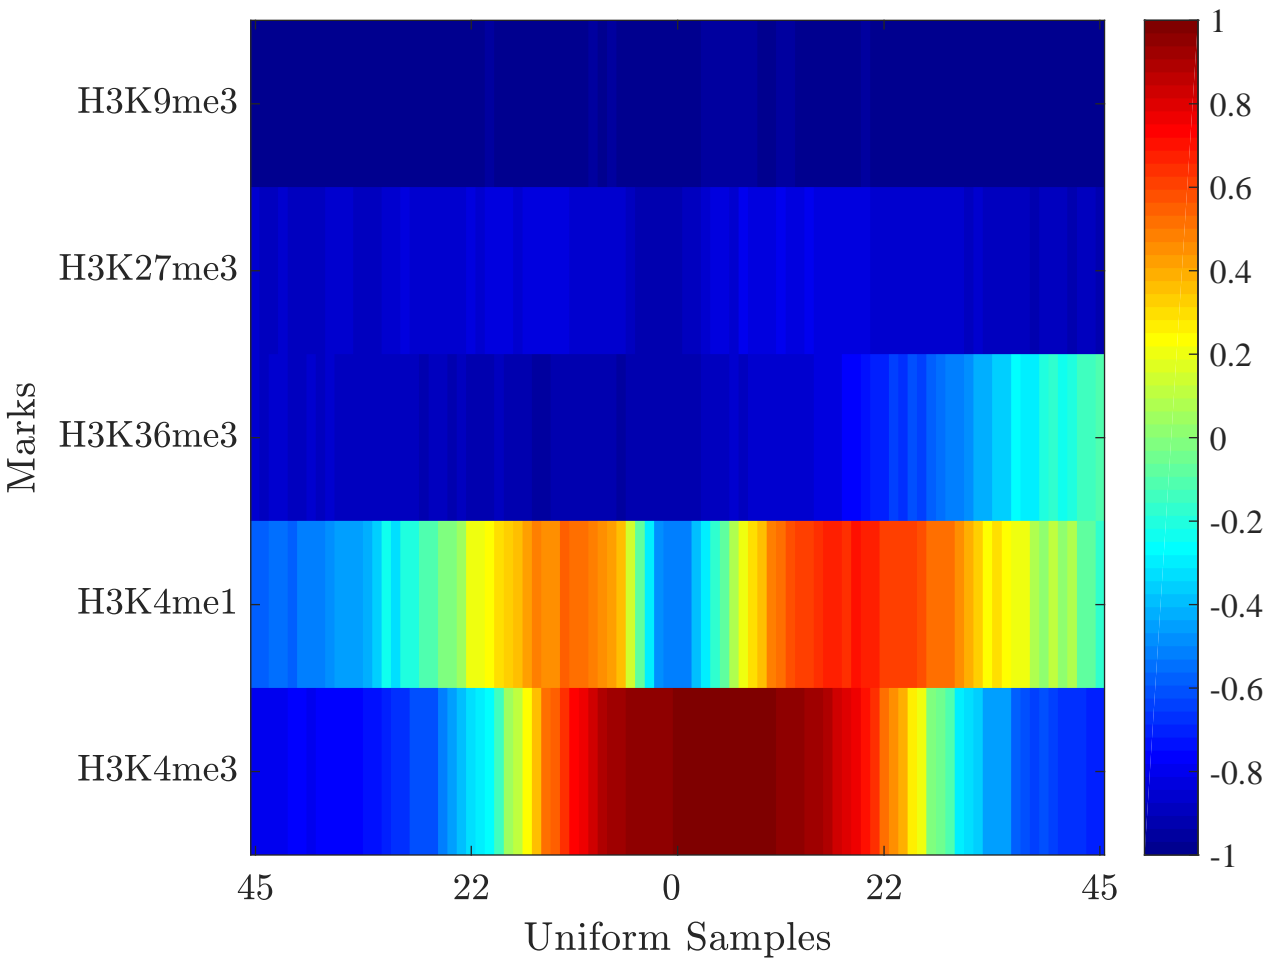

Supplement: Supplementary file 60 [file 12941978]

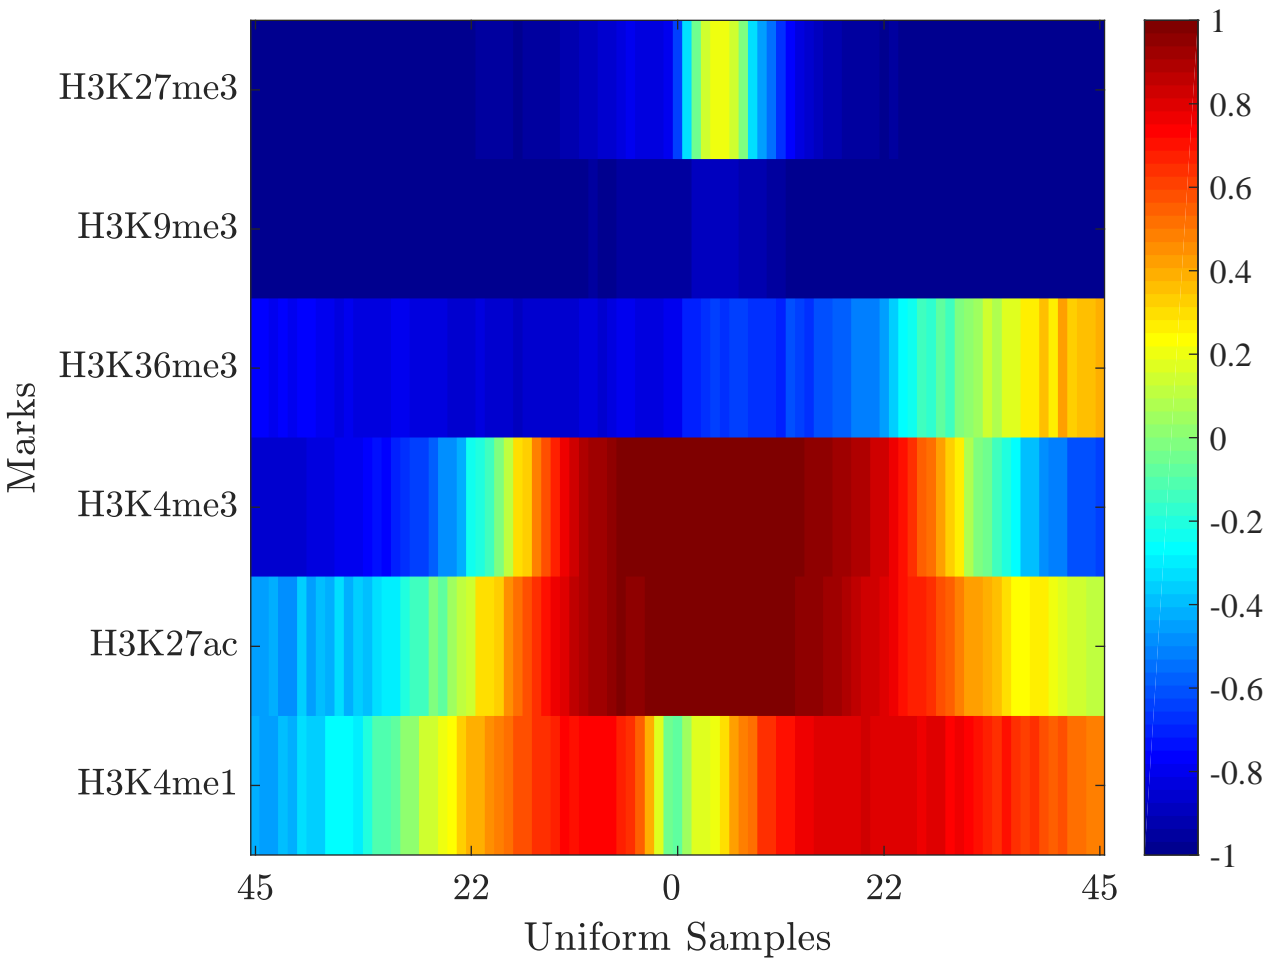

Supplement: Supplementary file 61 [file 12941978]

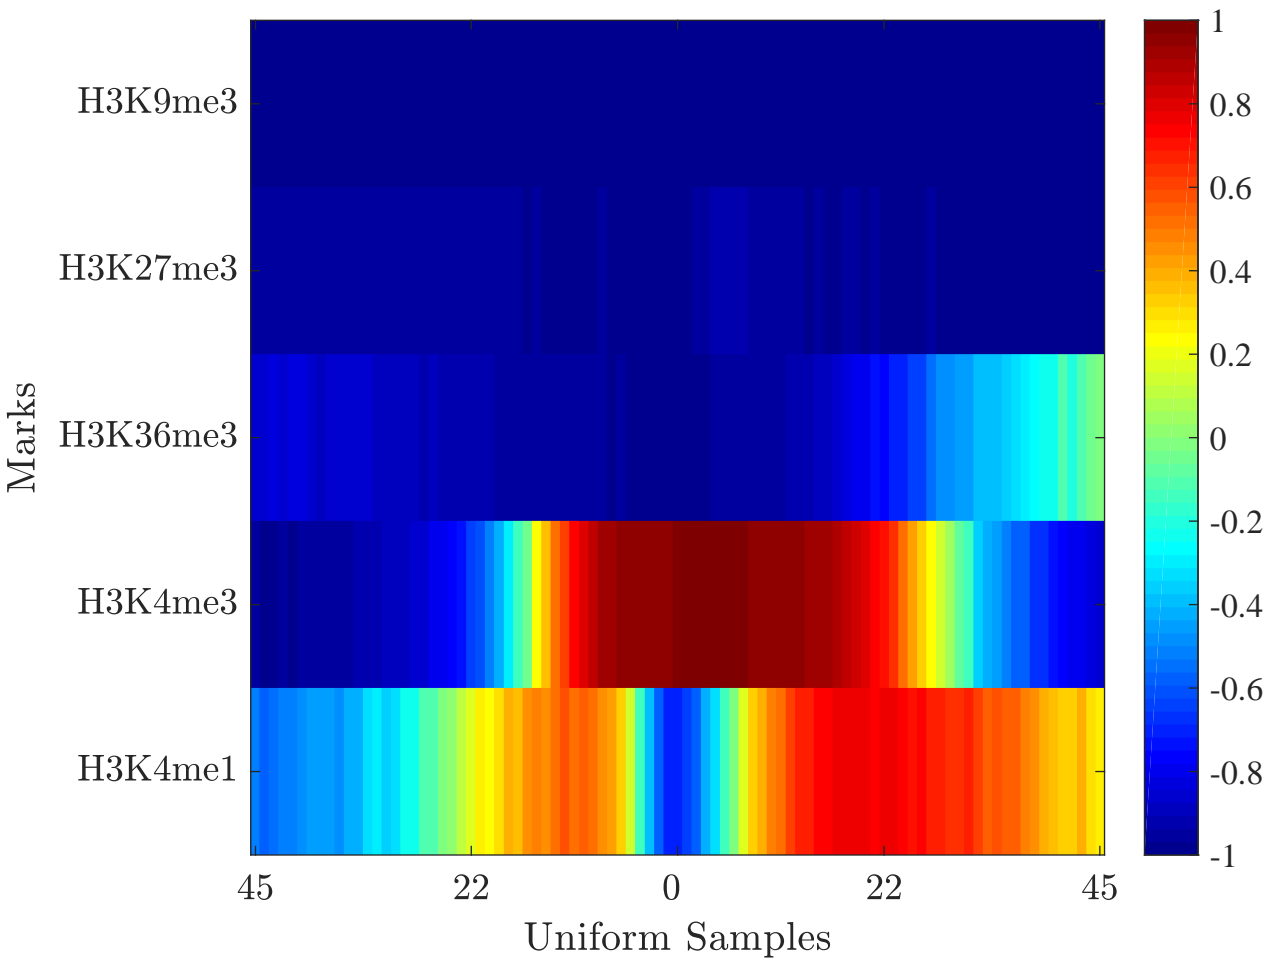

Supplement: Supplementary file 62 [file 12941978]
